# Supplementary material for: Identification of ferredoxin PA1551 in the bacterial iron uptake pathway and exploration of its antibacterial synergistic as target for biofilm inhibitors against Pseudomonas aeruginosa infection
Source: Research Square preprint supplement (doi:10.21203/rs.3.rs-6842284/v1), 2025-06-18

**Supporting information for:**

**Identification of ferredoxin PA1551 in the bacterial iron uptake pathway and exploration of its antibacterial synergistic as target for biofilm inhibitors against *Pseudomonas aeruginosa* infection**

**Authors:**Jun Liu1,#,*, Anmin Ren2,# , Zhiying Miao1, Tian Zhou2, Chenhui Zhang2, Yiqun Chang1,3, Siyu Zhao1, Xibing Hu1, Xiaoyi Zhang1, Tianyuan Jia2, Zhao Cai2, Zhengqiu Li1, Jing Lin1, Liang Yang2,*, Weimin Chen1,*

**Affiliations:**

1 State Key Laboratory of Bioactive Molecules and Druggability Assessment, College of Pharmacy, Institute for Advanced and Applied Chemical Synthesis, Jinan University, Guangzhou 510632, P. R. China

2 College of Medicine, Southern University of Science and Technology, Shenzhen 518055, P. R. China

3 Faculty of Medicine and Health, The University of Sydney, Sydney, NSW 2006, Australia

# These authors made equal contributions to this work.

* Corresponding authors

Email addresses: liujun__jnu@163.com (J.Liu), yangl@sustech.edu.cn (L.Yang), [twmchen@jnu.edu.cn](mailto:twmchen@jnu.edu.cn) (WM. Chen).

**Table of Contents**

[**Supplementary Figures** 3](#_Toc199429527)

[**Supplementary Tables** 8](#_Toc199429528)

[**Chemical Synthesis (General Notes)** 11](#_Toc199429529)

[**1H NMR spectra, 13C NMR spectra and HRMS of compounds.** 24](#_Toc199429530)

[**HPLC data of probes used in biological assays.** 47](#_Toc199429531)

Supplementary Figures

Supplementary **Figure 1.** **The toxicity of compound 10d in mice**


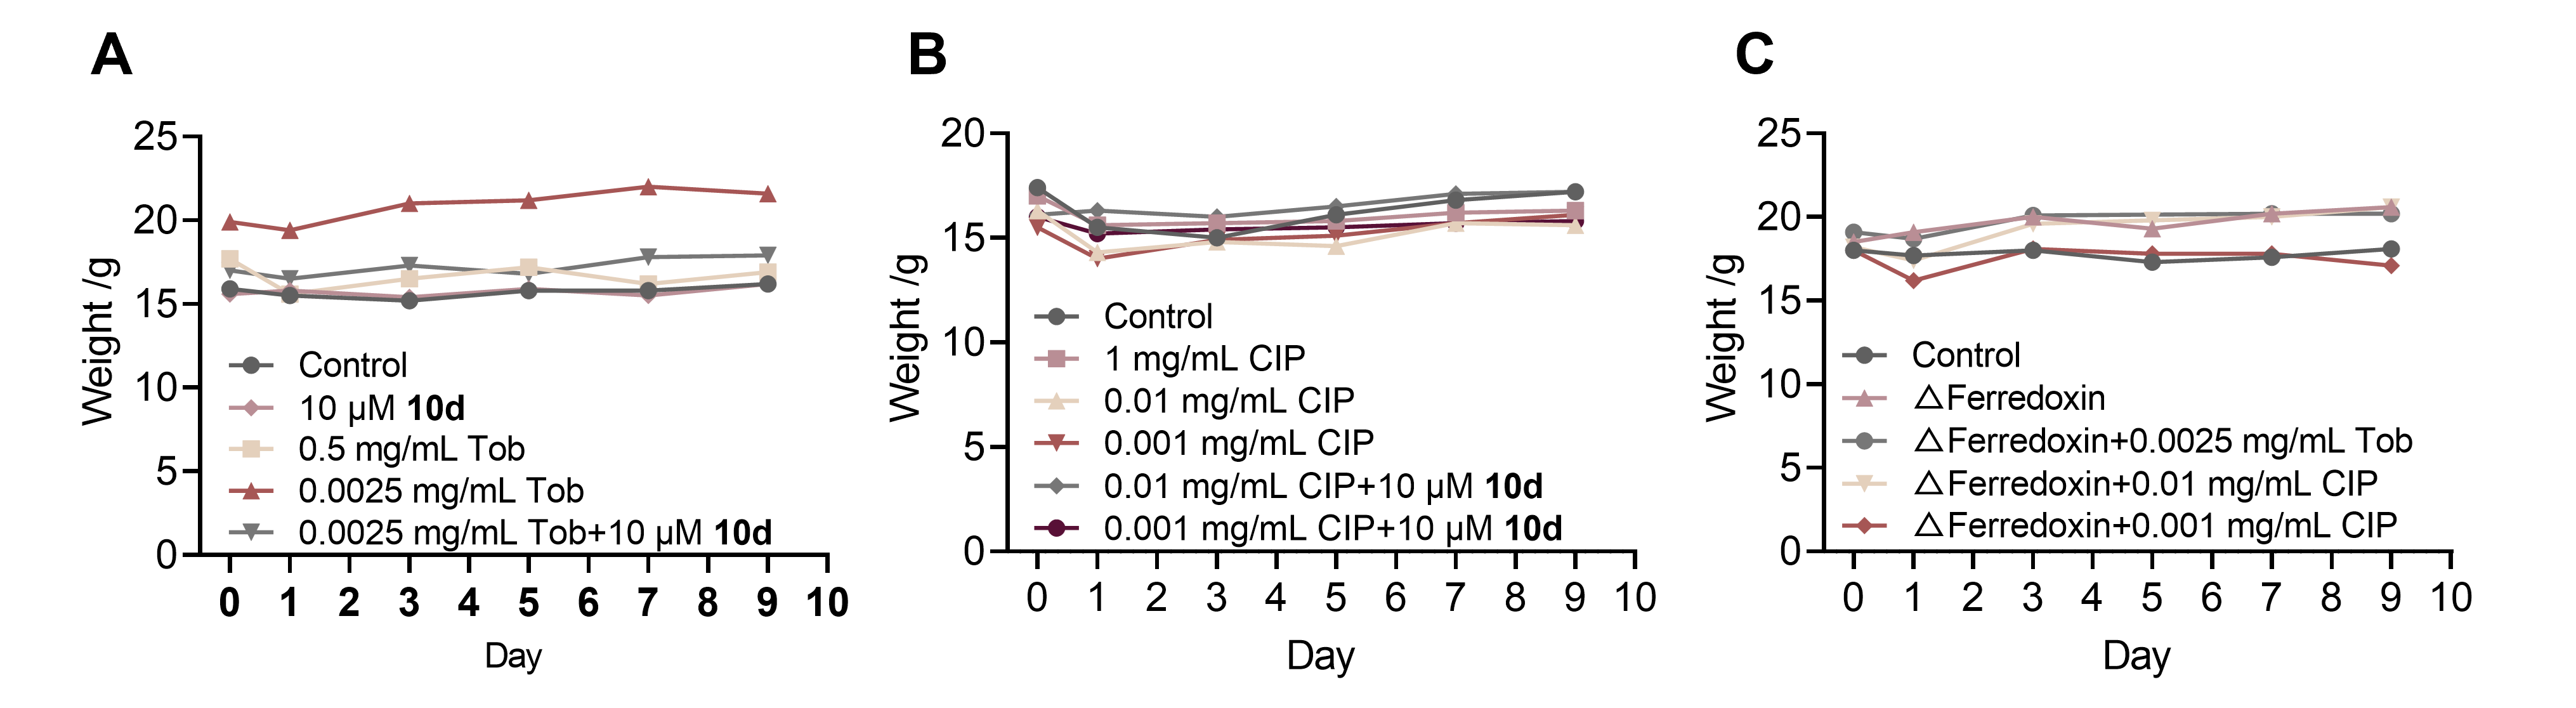


Supplementary **Figure 1.** **The toxicity of compound 10d in mice**. (A) *In vivo* toxicity of control (saline), **10d**, tobramycin (0.5 mg/mL), tobramycin (0.0025 mg/mL), and the tobramycin (0.0025 mg/mL) -**10d**. (B) *In vivo* toxicity of control (saline), ciprofloxacin (1 mg/mL), ciprofloxacin (0.01 mg/mL), ciprofloxacin (0.001 mg/mL), ciprofloxacin (0.01 mg/mL) -**10d**, and ciprofloxacin (0.001 mg/mL) -**10d**.(C) *In vivo* toxicity of *P. aeruginosa* PAO1 (or △ferredoxin) infection treated with control (saline) (or 0.0025 mg/mL Tob, 0.01mg/mL, and 0.001mg/mL CIP).

Supplementary **Figure 2.** **Binding site analysis of 10d (10 μM) with a synthetic peptide, SYWCDFENTQHRMK (400 μM), by LC−MS/MS.**


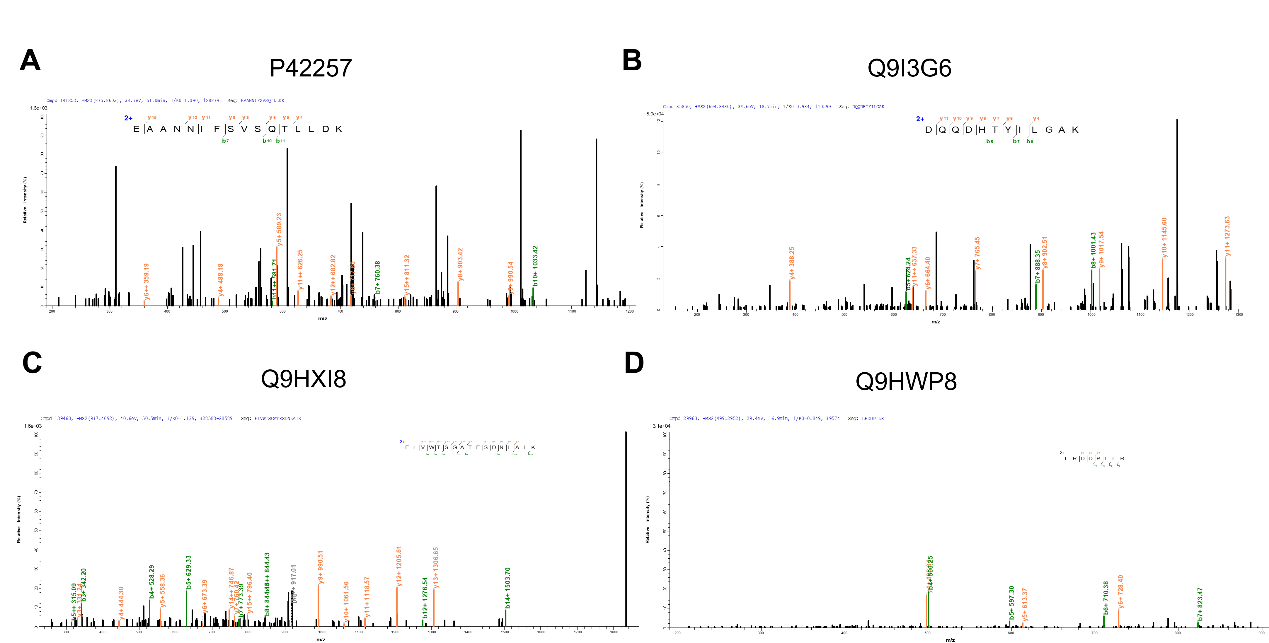


Supplementary **Figure 2.** **Binding site analysis of 10d (10 μM) with a synthetic peptide, SYWCDFENTQHRMK (400 μM), by LC−MS/MS.** (A) P42257 (B) Q9I3G6 (C) Q9HX18 (D) Q9HWP8.

Supplementary **Figure 3.** **The puried N-GST-ferredoxin protein migrated as a single band with a molecular mass of 79.6 kDa.**


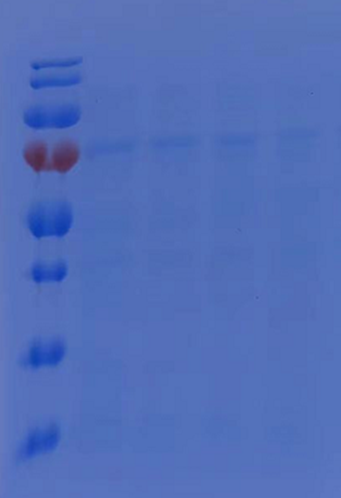


Supplementary **Figure 3.** **The puried N-GST-ferredoxin protein migrated as a single band with a molecular mass of 79.6 kDa.**

Supplementary **Figure 4.** **Trajectory-based scan.**


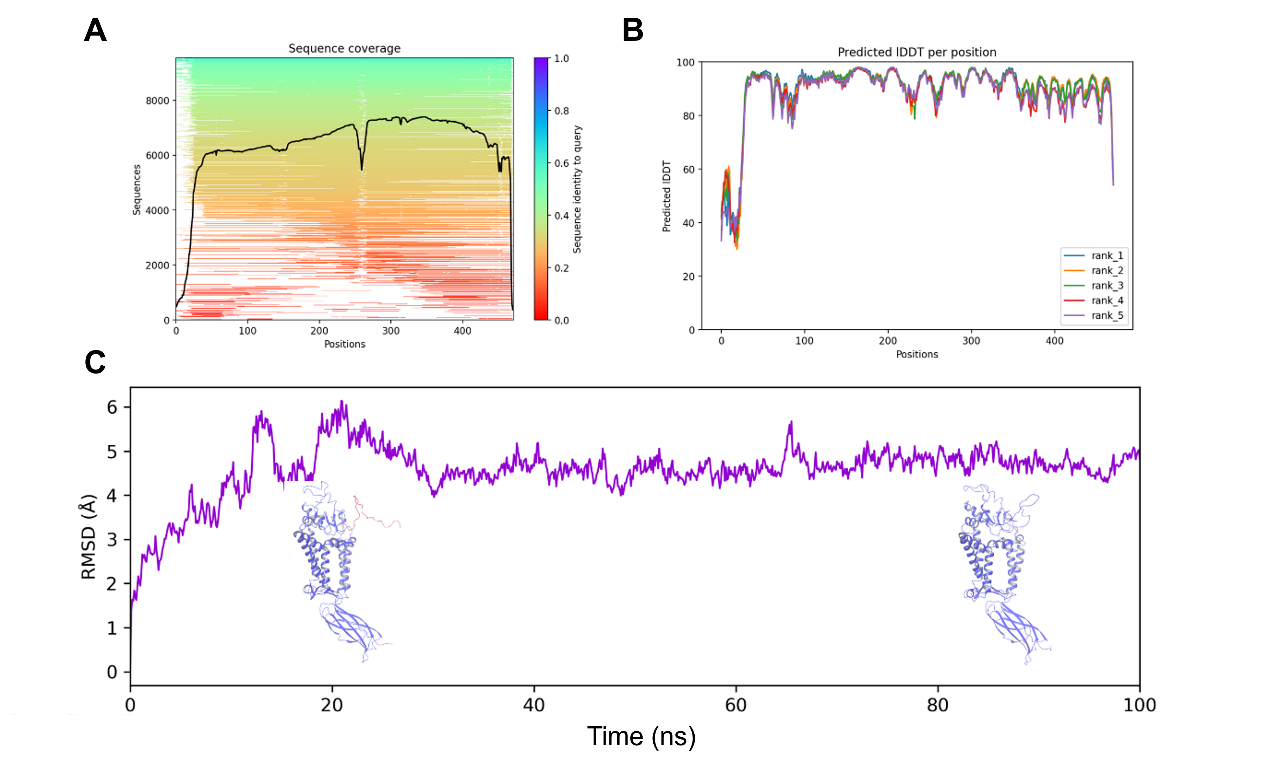


Supplementary **Figure 4.** (A) Sequence coverage of PA1551. (B) LDDT per residues of the top ranked models from AlphaFold. (C) RMSD of PA1551 Cα and the convergence of the N-termius loop, membrane is hidden.

Supplementary **Figure 5.** **Representative swarming, swimming and twitching motility image of P. aeruginosa PAO1, PA1551 deficient mutant and PA1551-overexpressing strain.**


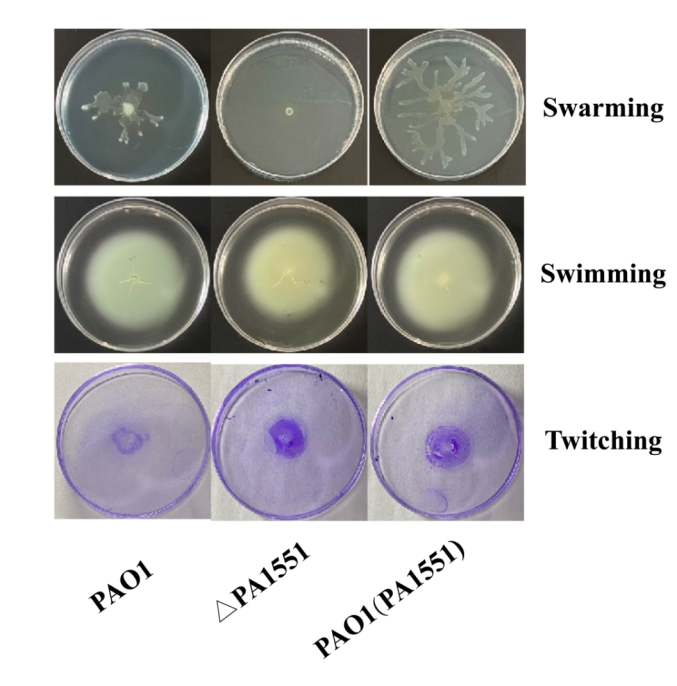


Supplementary **Figure 5.** Representative swarming, swimming and twitching motility image of *P. aeruginosa* PAO1, PA1551 deficient mutant and PA1551-overexpressing strain.

Supplementary Tables

Supplementary **Table 1.** **Docking and MMGBSA results of 10d and potential sites.**

| **Entry** | **Docking Score** | **Glide Ligand Efficiency** | **Glide Gscore** | **XP GScore** | **XP HBond** | **MMGBSA dG Bind** |
| --- | --- | --- | --- | --- | --- | --- |
| sitemap_2 | |  |  |  |  |  |
| 10d | -8.409 | -0.42 | -10.463 | -10.463 | -3.39 | -61.08 |
| 10d | -8.091 | -0.405 | -10.145 | -10.145 | -2.643 | -59.33 |
| 10d | -7.948 | -0.397 | -10.211 | -10.211 | -2.742 | -59.15 |
| 10d | -7.845 | -0.392 | -9.899 | -9.899 | -2.963 | -60.94 |
| 10d | -7.494 | -0.375 | -8.286 | -8.286 | -2.105 | -46.36 |
| 10d | -6.834 | -0.342 | -8.889 | -8.889 | -2.371 | -62.84 |
| 10d | -6.569 | -0.328 | -8.623 | -8.623 | -3.161 | -60.3 |
| 10d | -6.532 | -0.327 | -8.586 | -8.586 | -3.027 | -54.34 |
| 10d | -6.505 | -0.325 | -8.559 | -8.559 | -3.793 | -63.18 |
| 10d | -6.468 | -0.323 | -6.735 | -6.735 | -3.742 | -56.19 |
| 10d | -6.445 | -0.322 | -8.499 | -8.499 | -2.484 | -56.45 |
| sitemap_5 | |  |  |  |  |  |
| 10d | -4.9 | -0.245 | -5.166 | -5.166 | 0 | -29.52 |
| 10d | -4.248 | -0.212 | -4.515 | -4.515 | -0.48 | -42.28 |
| 10d | -4.212 | -0.211 | -5.005 | -5.005 | -0.48 | -34.04 |
| 10d | -4.126 | -0.206 | -4.392 | -4.392 | -1.739 | -38.98 |
| 10d | -4.078 | -0.204 | -4.345 | -4.345 | -1.44 | -16.71 |
| 10d | -3.969 | -0.198 | -4.235 | -4.235 | -1.096 | -38.47 |
| 10d | -3.92 | -0.196 | -4.187 | -4.187 | -0.96 | -37.01 |
| 10d | -3.878 | -0.194 | -4.67 | -4.67 | -0.96 | -29.33 |
| 10d | -3.848 | -0.192 | -4.115 | -4.115 | -0.625 | -35.74 |
| 10d | -3.803 | -0.19 | -4.596 | -4.596 | -1.44 | -25.9 |
| 10d | -3.773 | -0.189 | -4.04 | -4.04 | -0.48 | -31.76 |
| sitemap_9 | |  |  |  |  |  |
| 10d | -3.743 | -0.187 | -4.01 | -4.01 | -0.96 | -22.25 |
| 10d | -3.452 | -0.173 | -4.245 | -4.245 | -2.46 | 10.98 |
| 10d | -3.256 | -0.163 | -3.523 | -3.523 | -0.96 | -25.46 |
| 10d | -3.226 | -0.161 | -3.493 | -3.493 | -2.251 | 18.94 |
| 10d | -3.166 | -0.158 | -3.433 | -3.433 | -2.971 | -23.22 |
| 10d | -3.138 | -0.157 | -3.405 | -3.405 | -2.382 | -25.63 |
| 10d | -3.12 | -0.156 | -3.387 | -3.387 | -2.628 | -18.79 |
| 10d | -2.992 | -0.15 | -3.259 | -3.259 | -2.703 | -20.44 |
| 10d | -2.913 | -0.146 | -3.179 | -3.179 | -1.264 | -17.63 |
| 10d | -2.872 | -0.144 | -3.139 | -3.139 | -3.113 | -18.77 |
| 10d | -2.86 | -0.143 | -3.127 | -3.127 | -2.231 | -25.74 |
| sitemap_11 | |  |  |  |  |  |
| 10d | -4.413 | -0.221 | -4.68 | -4.68 | -1.982 | -33.45 |
| 10d | -4.333 | -0.217 | -4.6 | -4.6 | -2.55 | -30.76 |
| 10d | -4.223 | -0.211 | -4.49 | -4.49 | -1.874 | -36.51 |
| 10d | -4.154 | -0.208 | -4.421 | -4.421 | -2.2 | -31.96 |
| 10d | -4.102 | -0.205 | -4.894 | -4.894 | -0.63 | -39.73 |
| 10d | -4.095 | -0.205 | -4.362 | -4.362 | -1.528 | -19.22 |
| 10d | -3.981 | -0.199 | -4.248 | -4.248 | -1.556 | -29.09 |
| 10d | -3.963 | -0.198 | -4.23 | -4.23 | -1.397 | -28.86 |
| 10d | -3.892 | -0.195 | -4.684 | -4.684 | -1.625 | -43.48 |
| 10d | -3.859 | -0.193 | -4.126 | -4.126 | -1.67 | -22.3 |
| 10d | -3.85 | -0.192 | -4.116 | -4.116 | -1.559 | -25.99 |
| sitemap_16 | |  |  |  |  |  |
| 10d | -4.675 | -0.234 | -6.938 | -6.938 | -1.111 | -24.54 |
| 10d | -4.501 | -0.225 | -6.763 | -6.763 | -2.626 | -26.45 |
| 10d | -4.434 | -0.222 | -6.696 | -6.696 | -2.021 | -15.63 |
| 10d | -4.349 | -0.217 | -4.616 | -4.616 | -2.08 | -33.01 |
| 10d | -4.257 | -0.213 | -4.523 | -4.523 | -2.008 | -26.97 |
| 10d | -4.198 | -0.21 | -4.465 | -4.465 | -2.477 | -34.87 |
| 10d | -4.141 | -0.207 | -4.408 | -4.408 | -0.157 | -24.19 |
| 10d | -4.116 | -0.206 | -4.383 | -4.383 | -3.235 | -31.34 |
| 10d | -4.103 | -0.205 | -4.37 | -4.37 | -2.659 | -31.45 |
| 10d | -4.018 | -0.201 | -4.285 | -4.285 | -1.582 | -19.87 |
| 10d | -4.017 | -0.201 | -4.284 | -4.284 | -1.782 | -33.8 |

Supplementary **Table 2.** **Strains and plasmids used in this study.**

| **Strain or plasmid** | **Genotype and/or relevant characteristics** | **Source or reference** |
| --- | --- | --- |
| *P. aeruginosa* | Wild type strain | Laboratory store |
| Δferredoxin | ferredoxin in frame deletion strain | This study |
| ferredoxin-overexpressing | pUCP20 carrying Ferredoxin encoding gene | This study |
| pGEX-6P-1-GST-Ferredoxin(BL21) | pGEX-6P-1 carrying Ferredoxin encoding gene | This study |
| ***E. coli*** | | |
| DH5α | *E. coli*, F-, φ 80dlacZ ΔM15, Δ(lacZYA -argF)U169, deoR,  recA1, endA1, hsdR17 (rK-, mK+), phoA, supE44, λ-, thi -1,  gyrA96 , relA1 | Sangon |
| BL21 | *E. coli*，F- ompT hsdSB(rB- mB-)gal dcm(DE3) | Sangon |
| **Plasmids** | | |
| pRK600 | Helper plasmid, Cmr | Laboratory store |
| pK18-Gm | Suicide knock-out plasmid, Gmr | Laboratory store |
| pUCP20-Amp | *E. coli*-*P. aeruginosa* shuttle cloning vector | Laboratory store |
| pGEX-6P-1-GST- Amp | Expression vector with N-terminal GST tag | Laboratory store |

Supplementary **Table 3. Primers used in this study.**

| **Primers** | **Sequence** | **Purpose** |
| --- | --- | --- |
| Ferredoxin up F | AGCTCGGTACCCGGGGATCCTCTATTCATGCTGTTCGTCGGCACCCTG | For construction of PK18- Ferredoxin |
| Ferredoxin up R | CGGACTGCATGCTCAAGTTACTCACATCAGTGCGTACCACGGCAGTGG | For construction of PK18- Ferredoxin |
| Ferredoxin low F | CCACTGCCGTGGTACGCACTGATGTGAGTAACTTGAGCATGCAGTCCG | For construction of PK18- Ferredoxin |
| Ferredoxin low R | AACGACGGCCAGTGCCAAGCTTGCCAGTTCGCCAAGCAACTGGCTGAG | For construction of PK18- Ferredoxin |
| F1 | AGCTATGACCATGATTACGAATTCGATGAGCAAACAGATTCCCGTTCA | For construction of PUCP20- Ferredoxin |
| R1 | AAAACGACGGCCAGTGCCAAGCTTTCAACGGGTGCGTGGGCCAATGAA | For construction of PUCP20- Ferredoxin |
| Ferredoxin F1 | TTCCAGGGGCCCCTGGGATCCATGAGCAAACAGATTCCCGTTCA | For construction of PUCP20- Ferredoxin |
| Ferredoxin R1 | GAACTTGCGCTCGGGTAGGTCCCAACCGCCCACCATGCGCAGTCGGCG | For construction of pGEX-6P-1-GST-Ferredoxin |
| Ferredoxin F2 | CGCCGACTGCGCATGGTGGGCGGTTGGGACCTACCCGAGCGCAAGTTC | For construction of pGEX-6P-1-GST-Ferredoxin |
| Ferredoxin R2 | GAGCAGCTCGGGAATCAGCTCGCGGCTGTGCTTGGCGGTCTTGCGCAG | For construction of pGEX-6P-1-GST-Ferredoxin |
| Ferredoxin F3 | CTGCGCAAGACCGCCAAGCACAGCCGCGAGCTGATTCCCGAGCTGCTC | For construction of pGEX-6P-1-GST-Ferredoxin |
| Ferredoxin R3 | CTCGAGTCGACCCGGGAATTCTCAACGGGTGCGTGGGCCAATGAA | For construction of pGEX-6P-1-GST-Ferredoxin |

**Chemical Synthesis (General Notes)**

All chemicals were obtained from commercial vendors and used without further purification unless indicated otherwise. All reactions involving anhydrous conditions were carried out under an argon or nitrogen atmosphere using oven-dried glassware. AR-grade solvents were used for all reactions. 1H NMR and 13C NMR spectra were recorded on BrukerAvance III HD-400 spectrometer. Chemical shifts (*δ*) were reported in parts per million (ppm) relative to the internal standard tetramethylsilane or residual solvent peaks (CDCl3 = 7.26 ppm, DMSO-*d*6 = 2.50 ppm). The following abbreviations were used in reporting spectra, brs (broad singlet), s (singlet), d (doublet), t (triplet), q (quartet), m (multiplet), dd (doublet of doublets). Reaction progress was monitored by thin layer chromatography (TLC) on pre-coated Merck 60 F254 silica gel plates and spots were visualized by UV, iodine or other suitable stains. High-resolution mass spectra (HRMS) were obtained on ABSCIEX Triple Quad 4500 LC/MS mass spectrometer**.** Melting point analysis was determined with a microscopic melting point apparatus (JHX-5Plus). Melting points are uncorrected. High-performance liquid chromatography (HPLC) analyses were conducted with a Thermo Scientific Dionex Ultimate 3000 series consisting of an RS pump, an automatic solvent degasser, and a manual injector. Separations were carried out using a reversed-phase C18 analytical column. All final compounds were detected at 254 nm with an SPD-M20A diode array detector and obtained with a purity of > 95%.

**Supplementary Scheme 1. Synthesis of key intermediate 1-6.**

**Supplementary Scheme 2. Synthesis of key intermediate 2-8.**

**Supplementary Scheme 3. Synthesis of compound 10d-1.**

**Supplementary Scheme 4. Synthesis of compound 10d-2.**

**Supplementary Scheme 5. Synthesis of compound 10d-3.**

**Supplementary Scheme 6. Synthesis of compound 10d-4.**

**Supplementary Scheme 7. Synthesis of compound 10d-5.**

**Supplementary Scheme 8. Synthesis of the Negative Probe NP.**

**Scheme S9. Synthesis of the Negative Probe NP-1.**

**Supplementary Scheme 10. Synthesis of the Negative Probe NP-2.**

**2-(Aminomethyl)-3-(benzyloxy)-1,6-dimethylpyridin-4(1*H*)-one (1-6):** Key intermediates **1-1** to **1-6** were synthesized by following previously published procedures1-2.

**5-Hydroxy-2-(((tetrahydro-2*H*-pyran-2-yl)oxy)methyl)-4*H*-pyran-4-one (2-1):**Kojic acid (20.00 g, 140.74 mmol) was dissolved in anhydrous DCM (200 mL), 3,4-dihydropyran (15.4 mL, 168.89 mmol) and a catalytic amount of *p*-toluenesulfonic acid monohydrate (1.34 g, 7.04 mmol) were added, then allowed to react at room temperature for 3 h. Subsequently, the reaction solution was washed twice with brine, dried over Na2SO4, filtered, and concentrated under reduced pressure to give a crude product. The crude product was recrystallized from isopropyl ether (15 mL), afford the yellow granular solid **2-1** (25.88 g, 81.31%). 1H NMR (400 MHz, CDCl3) *δ* 7.83 (s, 1H), 6.56 (s, 1H), 4.83 – 4.69 (m, 1H), 4.54 (d, *J* = 14.5 Hz, 1H), 4.35 (d, *J* = 14.5 Hz, 1H), 3.86 – 3.78 (m, 1H), 3.57 – 3.51 (m, 1H), 1.94 – 1.54 (m, 6H). 13C NMR (101 MHz, CDCl3) *δ* 174.38, 165.80, 145.86, 138.18, 110.61, 98.24, 64.44, 62.05, 30.11, 25.17, 18.78. HRMS (ESI): calcd for C11H14O5 [M + H]+ = 227.0914, found [M + H]+ =227.0931.

**3-Hydroxy-2-(hydroxymethyl)-6-(((tetrahydro-2*H*-pyran-2-yl)oxy)methyl)-4*H*-pyran-4-one (2-2):** Compound **2-1** (20.00 g, 88.41 mmol) was dissolved in water (200 mL) and NaOH (4.24 g, 106.09 mmol) was added, 37% aqueous formaldehyde solution (14.3 mL) was added dropwise, and the mixture was stirred at room temperature overnight. After the reaction was completed, the pH was adjusted to 6 with concentrated HCl and the mixture was extracted with CH2Cl2 (5×100 mL). The organic phase was combined together, washed with brine, dried over Na2SO4, filtered, and the filtrate was concentrated under reduced pressure to give **2-2** as a yellow oil (16.80 g, 74.16%). 1H NMR (400 MHz, DMSO-*d6*) *δ* 9.05 (s, 1H), 6.38 (s, 1H), 5.38 (s, 1H), 4.78 – 4.67 (m, 1H), 4.49 – 4.34 (m, 4H), 3.81 – 3.71 (m, 1H), 3.51 – 3.43 (m, 1H), 1.78 – 1.46 (m, 6H). 13C NMR (101 MHz, DMSO-*d6*) *δ* 174.31, 164.10, 150.26, 142.38, 111.21, 98.21, 64.74, 61.84, 55.49, 30.33, 25.31, 19.21. HRMS (ESI): calcd for C12H16O6 [M + H]+ = 257.1020, found [M + H]+ =257.1027.

**3-(Benzyloxy)-2-(hydroxymethyl)-6-(((tetrahydro-2*H*-pyran-2-yl)oxy)methyl)-4*H*-pyran-4-one (2-3):** Compound **2-2** (16.80 g, 65.56 mmol) was dissolved in MeOH (200 mL), NaOH (5.24 g, 131.12 mmol) was added, and benzyl chloride (13.6 mL, 118.01 mmol) was slowly added dropwise. The reaction was completed after reflux for 12 h. The reaction solution was concentrated under reduced pressure, and the residue was dissolved in H2O (100 mL) and extracted three times with DCM. The combined organic layers were washed with brine and dried over anhydrous Na2SO4. Upon solvent evaporation, the residue was purified by flash column chromatography (DCM:MeOH:TEA = 160:1:0.1) to afford the yellow oil **2-3** (14.50 g, 63.91%). 1H NMR (400 MHz, CDCl3) *δ* 7.38 – 7.30 (m, 5H), 6.47 (s, 1H), 5.16 (s, 2H), 4.71 – 4.63 (m, 1H), 4.47 (d, *J* = 14.7 Hz, 1H), 4.34 – 4.26 (m, 3H), 3.82 – 3.74 (m, 1H), 3.54 – 3.47 (m, 1H), 1.85 – 1.51 (m, 6H). 13C NMR (101 MHz, CDCl3) *δ* 176.20, 164.46, 158.74, 142.52, 136.40, 129.27, 128.71, 128.66, 113.73, 98.34, 73.95, 64.15, 62.10, 57.37, 30.14, 25.22, 18.82. HRMS (ESI): calcd for C19H22O6 [M + H]+ = 347.1489, found [M + H]+ =347.1492.

**3-(Benzyloxy)-2-(hydroxymethyl)-1-methyl-6-(((tetrahydro-2*H*-pyran-2-yl)oxy)methyl)pyridin-4(1*H*)-one (2-4):** The yellow oil **2-3** (14.50 g, 41.86 mmol)was dissolved in EtOH (60 mL) and 40% methylamine aqueous solution (32.5 mL). The reaction mixture was sealed in a thick-walled glass tube and stirred at 75 °C for 12 h. Next, the mixture was concentrated in *vacuo* and crude product was purified by flash column chromatography (DCM:MeOH:TEA = 120:1:0.2) to give a grey solid. The grey solid was recrystallized from acetone to afford **2-4** as off white powder(7.37 g, 48.94%). 1H NMR (400 MHz, CDCl3) *δ* 7.29 (s, 5H), 6.50 (s, 1H), 5.02 (s, 2H), 4.66 – 4.60 (m, 1H), 4.56 (d, *J* = 13.4 Hz, 1H), 4.50 (d, *J* = 13.7 Hz, 2H), 4.22 (d, *J* = 13.1 Hz, 1H), 3.82 – 3.77 (m, 1H), 3.62 (s, 3H), 3.57 – 3.51 (m, 1H), 1.80 – 1.49 (m, 6H). 13C NMR (101 MHz, CDCl3) *δ* 174.00, 146.13, 145.69, 144.07, 137.32, 129.14, 128.28, 128.01, 118.43, 98.30, 73.20, 65.52, 62.56, 55.06, 35.38, 30.32, 25.19, 19.20. HRMS (ESI): calcd for C20H25NO5 [M + H]+ = 360.1805, found [M + H]+ =360.1845.

**2-(Aminomethyl)-3-(benzyloxy)-1-methyl-6-(((tetrahydro-2*H*-pyran-2-yl)oxy)methyl) pyridin-4(1*H*)-one (2-5):** Compound **2-4** (5.86 g, 16.30 mmol), phthalimide (3.36 g, 22.83 mmol), and triphenylphosphine (5.98 g, 22.83 mmol) were placed in a dry 250 mL two-neck flask and protected under nitrogen. Subsequently, 100 mL of anhydrous THF was added and the reaction mixture was placed in ice H2O at 0 °C for 30 min, and then diisopropyl azodicarboxylate (4.6 mL, 22.83 mmol) was slowly added dropwise. The mixture was slowly raised to room temperature for 16h. After the reaction was completed, the mixture was concentrated under reduced pressure. The residue was dissolved in 50 mL H2O, extracted with CH2Cl2 (3×100 mL), washed with brine, dried over anhydrous Na2SO4 and filtered. Upon solvent evaporation, the residue was purified by flash column chromatography (DCM:MeOH:TEA = 100:1:0.2) to afford an orange oil. The orange oil was dissolved in EtOH (60 mL), 16 mL of 80% hydrazine hydrate was added and the mixture was heated to reflux for 4h. Then the reaction mixture was concentrated under reduced pressure. H2O (25 mL) was added to the residue, followed by 10N NaOH solution, adjusting to pH = 12, extracted with DCM (3×100 mL), dried over anhydrous Na2SO4, filtered, and the filtrate was concentrated under reduced pressure. Column chromatography eluted with DCM:MeOH:TEA = 50:1:0.1. **2-5** was a colorless crystal (5.15 g, 88.15%). 1H NMR (400 MHz, CDCl3) *δ* 7.37 – 7.26 (m, 5H), 6.50 (s, 1H), 5.25 (s, 2H), 4.67 – 4.63 (m, 1H), 4.58 (d, *J* = 13.0 Hz, 1H), 4.30 (d, *J* = 13.0 Hz, 1H), 3.85 – 3.73 (m, 3H), 3.67 (s, 3H), 3.55 – 3.49 (m, 1H), 1.80 – 1.48 (m, 6H). 13C NMR (101 MHz, CDCl3) *δ* 173.70, 145.72, 145.26, 144.37, 137.47, 129.42, 128.49, 128.27, 119.02, 98.32, 72.88, 65.89, 62.65, 37.07, 35.06, 30.34, 25.18, 19.26. HRMS (ESI): calcd for C20H26N2O4 [M + H]+ = 359.1965, found [M + H]+ =359.2026.

***N*-((3-(benzyloxy)-1-methyl-4-oxo-6-(((tetrahydro-2*H*-pyran-2-yl)oxy)methyl)-1,4-dihydropyridin-2-yl)methyl)heptanamide (2-6):**Compound **2-5** (5.15 g, 14.37 mmol), EDCI (3.32 g, 17.24 mmol), HOBt (2.34 g, 17.24 mmol), DMAP (2.11 g, 17.24 mol) and 6-Heptynoic acid (2.24 mL, 15.81 mmol) were dissolved in anhydrous DCM (60 mL) under nitrogen atmosphere. The mixture was stirred for 12 h at room temperature. Subsequently, the reaction was quenched by saturated aqueous NH4Cl solution (30 mL) and then extracted with CH2Cl2 (3×100 mL). The organic phase was combined together, washed with saturated aqueous NH4Cl and dried over Na2SO4. Upon solvent evaporation, the residue was purified by flash column chromatography (DCM:MeOH:TEA = 40:1:0.1) to afford the pale yellow oil **2-6** (6.16 g, 90.99%). 1H NMR (400 MHz, CDCl3) *δ* 7.28 (s, 5H), 6.39 (s, 1H), 5.13 (s, 2H), 4.63 – 4.60 (m, 1H), 4.51 (d, *J* = 13.1 Hz, 1H), 4.35 (d, *J* = 5.6 Hz, 2H), 4.21 (d, *J* = 13.1 Hz, 1H), 3.79 – 3.72 (m, 1H), 3.53 – 3.47 (m, 4H), 2.08 (t, *J* = 7.6 Hz, 2H), 1.79 – 1.65 (m, 2H), 1.59 – 1.47 (m, 6H), 1.27 – 1.21 (m, 6H), 0.82 (t, *J* = 6.7 Hz, 3H). 13C NMR (101 MHz, CDCl3) *δ* 173.36, 173.07, 146.30, 146.10, 141.68, 137.27, 129.29, 128.61, 128.41, 118.87, 98.42, 72.82, 65.73, 62.65, 36.18, 35.76, 34.52, 31.53, 30.31, 28.99, 25.51, 25.16, 22.49, 19.22, 14.04. HRMS (ESI): calcd for C27H38N2O5 [M + H]+ = 471.2853, found [M + H] + =471.2890.

***N*-((3-(benzyloxy)-6-(hydroxymethyl)-1-methyl-4-oxo-1,4-dihydropyridin-2-yl)methyl)heptanamide (2-7):** The pale yellow oil **2-6** (6.16 g, 13.10 mmol) was dissolved in EtOH (50 mL), and 2N HCl (19 mL) was added. After heated to reflux for 4h, the solvent was concentrated in *vacuo* prior to addition of H2O (40 mL). Subsequent adjustment of the aqueous fraction to pH = 9 with 10N NaOH solution was followed by extraction with DCM (5×100 mL). The organic phase was dried over anhydrous Na2SO4, filtered, and the filtrate was concentrated under reduced pressure. The residue was purified by flash column chromatography (DCM:MeOH = 20:1) to give compound **2-7** as a yellow solid (4.23 g, 83.56%). 1H NMR (400 MHz, DMSO-*d6*) *δ* 8.05 (t, *J* = 4.9 Hz, 1H), 7.46 – 7.27 (m, 5H), 6.34 (s, 1H), 5.65 (t, *J* = 5.5 Hz, 1H), 5.09 (s, 2H), 4.41 (d, *J* = 5.2 Hz, 2H), 4.38 (d, *J* = 4.9 Hz, 2H), 3.47 (s, 3H), 2.08 (t, *J* = 7.4 Hz, 2H), 1.53 – 1.43 (m, 2H), 1.27 – 1.19 (m, 6H), 0.83 (t, *J* = 6.8 Hz, 3H). 13C NMR (101 MHz, DMSO-*d6*) *δ* 172.73, 172.69, 150.62, 146.34, 141.32, 138.17, 128.83, 128.69, 128.31, 116.46, 72.70, 60.57, 35.52, 35.11, 34.65, 31.45, 28.84, 25.63, 22.44, 14.37. HRMS (ESI): calcd for C22H30N2O4 [M + H]+ = 387.2278, found [M + H]+ =387.2287.

***N*-((6-(aminomethyl)-3-(benzyloxy)-1-methyl-4-oxo-1,4-dihydropyridin-2-yl)methyl)heptanamide (2-8):** The synthetic procedures of compound **2-8** were similar to compound **2-5**. The crude product was purified by column chromatography (DCM:MeOH:TEA = 20:1:0.05) to afford white solid **2-8** (2.92 g, 69.49%). 1H NMR (400 MHz, DMSO-*d6*) *δ* 8.05 (t, *J* = 4.9 Hz, 1H), 7.50 – 7.27 (m, 5H), 6.36 (s, 1H), 5.09 (s, 2H), 4.38 (d, *J* = 5.0 Hz, 2H), 3.65 (s, 2H), 3.49 (s, 3H), 2.09 (t, *J* = 7.4 Hz, 2H), 1.53 – 1.43 (m, 2H), 1.31 – 1.20 (m, 6H), 0.87 – 0.79 (m, 3H). 13C NMR (101 MHz, DMSO-*d6*) *δ* 172.77, 172.68, 152.47, 146.15, 141.05, 138.23, 128.81, 128.68, 128.28, 116.38, 72.69, 43.46, 35.53, 34.94, 34.73, 31.45, 28.81, 25.64, 22.45, 14.37. HRMS (ESI): calcd for C22H31N3O3 [M + H]+ = 386.2438, found [M + H]+ =386.2475.

***N*-((3-(benzyloxy)-1,6-dimethyl-4-oxo-1,4-dihydropyridin-2-yl)methyl)-3-(3-(but-3-yn-1-yl)-3*H*-diazirin-3-yl)propanamide (1-7):**Compound **1-6** (142.0 mg, 0.55 mmol), 1-ethyl-3(3-dimethylpropylamine) carbodiimide hydrochloride (EDCI) (126.5 mg, 0.66 mmol), 1-Hydroxybenzotriazole (HOBt) (89.2 mg, 0.66 mmol), 4-(*N,N*-dimethylamino)pyridine (DMAP) (80.6 mg, 0.66 mmol) and 3-(3-(but-3-yn-1-yl)-3H-diazirin-3-yl)propanoic acid (100.0 mg, 0.60 mmol) were dissolved in dichloromethane (5 mL) under nitrogen atmosphere. The mixture was stirred for 12 h at room temperature in the dark. Subsequently, the reaction was quenched by saturated aqueous NH4Cl solution (10 mL) and then extracted with CH2Cl2 (3×50 mL). The organic phase was combined together, washed with saturated aqueous NH4Cl and dried over Na2SO4. Upon solvent evaporation, the residue was purified by flash column chromatography (DCM:MeOH = 40:1) to afford the pale yellow oil **1-7** (220.6 mg, 98.67%). 1H NMR (400 MHz, CDCl3) *δ* 7.39 – 7.33 (m, 5H), 6.24 (s, 1H), 5.12 (s, 2H), 4.41 (d, *J* = 5.4 Hz, 2H), 3.48 (s, 3H), 2.26 (s, 3H), 2.08 – 1.94 (m, 5H), 1.82 (t, *J* = 7.5 Hz, 2H), 1.66 (t, *J* = 7.3 Hz, 2H). 13C NMR (101 MHz, CDCl3) *δ* 173.17, 171.29, 147.46, 146.12, 140.84, 137.22, 128.73, 128.48, 128.19, 118.34, 82.73, 72.90, 69.18, 36.23, 34.81, 32.32, 29.64, 27.96, 27.93, 20.84, 13.26. HRMS (ESI): calcd for C23H26N4O3 [M + H]+ = 407.2078, found [M + H]+ =407.2095.

**3-(3-(But-3-yn-1-yl)-3*H*-diazirin-3-yl)-*N*-((3-hydroxy-1,6-dimethyl-4-oxo-1,4-dihydropyridin-2-yl)methyl)propanamide (10d-1):** Compound **1-7** (220.0 mg, 0.54 mmol) was dissolved in 5 mL trifluoroacetic acid and stirred for 4h at 50 °C in the dark. Then, 10N NaOH was added dropwise to adjust pH = 5 under ice bath. The mixture was extracted with CH2Cl2 (3×50 mL) and the combined organic layers were washed with brine, dried over NaSO4. Upon solvent evaporation in *vacuo*, the residue was purified by flash column chromatography (DCM:MeOH = 30:1) to afford light red powder **10d-1** (108.0 mg, 63.22%). 1H NMR (400 MHz, DMSO-*d6*) *δ* 8.21 (t, *J* = 4.6 Hz, 1H), 6.12 (s, 1H), 4.42 (d, *J* = 4.9 Hz, 2H), 3.47 (s, 3H), 2.82 (t, *J* = 2.6 Hz, 1H), 2.29 (s, 3H), 2.02 – 1.90 (m, 4H), 1.66 (t, *J* = 7.6 Hz, 2H), 1.56 (t, *J* = 7.4 Hz, 2H). 13C NMR (101 MHz, DMSO-*d6*) *δ* 171.23, 169.83, 146.55, 146.22, 129.03, 112.79, 83.64, 72.21, 35.94, 34.56, 31.89, 29.66, 28.71, 28.47, 20.73, 13.12. HRMS (ESI): calcd for C16H20N4O3 [M + H]+ = 317.1608, found [M + H]+ =317.1585. Mp: 170.1−171.8 °C.

***N*-((3-(benzyloxy)-6-((3-(3-(but-3-yn-1-yl)-3*H*-diazirin-3-yl)propanamido)methyl)-1-methyl-4-oxo-1,4-dihydropyridin-2-yl)methyl)heptanamide (2-9):**The reaction was conducted as described for compound **1-7**, using compound **2-8** (212.0 mg, 0.55 mmol) and 3-(3-(but-3-yn-1-yl)-3H-diazirin-3-yl)propanoic acid (100.0 mg, 0.60 mmol). The crude product was purified by column chromatography (DCM:MeOH = 20:1) to afford light yellow oil **2-9** (255.0 mg, 86.88%). 1H NMR (400 MHz, DMSO-*d6*) *δ* 8.43 (t, *J* = 5.8 Hz, 1H), 8.05 (t, *J* = 4.9 Hz, 1H), 7.51 – 7.31 (m, 5H), 6.20 (s, 1H), 5.08 (s, 2H), 4.39 (d, *J* = 4.9 Hz, 2H), 4.26 (d, *J* = 5.7 Hz, 2H), 3.45 (s, 3H), 2.84 (t, *J* = 2.6 Hz, 1H), 2.09 (t, *J* = 7.4 Hz, 2H), 2.06 – 1.95 (m, 4H), 1.70 (t, *J* = 7.6 Hz, 2H), 1.58 (t, *J* = 7.4 Hz, 2H), 1.51 – 1.41 (m, 2H), 1.29 – 1.20 (m, 6H), 0.84 (t, *J* = 6.7 Hz, 3H). 13C NMR (101 MHz, DMSO-*d6*) *δ* 172.70, 172.48, 171.39, 148.11, 146.36, 141.35, 138.12, 128.85, 128.70, 128.34, 116.31, 83.64, 72.70, 72.25, 35.54, 35.47, 34.72, 31.97, 31.44, 29.70, 28.81, 28.69, 28.35, 25.61, 22.44, 14.38, 13.14. HRMS (ESI): calcd for C30H39N5O4 [M + H]+ = 534.3075, found [M + H]+ =534.3081.

***N*-((6-((3-(3-(but-3-yn-1-yl)-3*H*-diazirin-3-yl)propanamido)methyl)-3-hydroxy-1-methyl-4-oxo-1,4-dihydropyridin-2-yl)methyl)heptanamide (10d-2):**The synthetic procedures of compound **10d-2** were similar to compound **10d-1**, using compound **2-9** (245.0 mg, 0.46 mmol) and trifluoroacetic acid (5 mL). The crude product was purified by column chromatography (DCM:MeOH = 20:1) to afford light red powder **10d-2** (136.0 mg, 66.66%). 1H NMR (400 MHz, DMSO-*d6*) *δ* 8.42 (s, 1H), 8.15 (s, 1H), 6.14 (s, 1H), 4.43 (d, *J* = 4.6 Hz, 2H), 4.25 (d, *J* = 4.6 Hz, 2H), 3.49 (s, 3H), 2.84 (t, *J* = 2.5 Hz, 1H), 2.09 (t, *J* = 7.4 Hz, 2H), 2.04 – 1.97 (m, 4H), 1.70 (t, *J* = 7.6 Hz, 2H), 1.58 (t, *J* = 7.4 Hz, 2H), 1.51 – 1.45 (m, 2H), 1.23 (s, 6H), 0.85 (t, *J* = 6.7 Hz, 3H). 13C NMR (101 MHz, DMSO-*d6*) *δ* 172.78, 171.33, 169.91, 146.54, 146.33, 129.90, 111.38, 83.63, 72.24, 40.30, 35.55, 35.32, 34.36, 31.96, 31.45, 29.69, 28.82, 28.69, 28.36, 25.65, 22.45, 14.39, 13.13. HRMS (ESI): calcd for C23H33N5O4 [M + H]+ = 444.2605, found [M + H]+ =444.2610. Mp: 205.3−206.6 °C.

***N*-((3-(benzyloxy)-1,6-dimethyl-4-oxo-1,4-dihydropyridin-2-yl)methyl)hept-6-ynamide (1-8):** Compound **1-6** (400.0 mg, 1.55 mmol), EDCI (356.6 mg, 1.86 mmol), HOBt (251.3 mg, 1.86 mmol), DMAP (227.2 mg, 1.86 mmol) and 6-Heptynoic acid (0.22 mL, 1.71 mmol) in anhydrous dichloromethane (10 mL) were stirred under nitrogen gas at room temperature. After completion (by TLC), saturated aqueous NH4Cl solution was added. The organic phase was separated, washed with brine and dried over Na2SO4. The solvent was removed in *vacuo*, then the residue was purified by flash column chromatography (DCM:MeOH = 20:1) to afford the Colorless oil **1-8** (530.0 mg, 93.30%). 1H NMR (400 MHz, CDCl3) *δ* 7.37 – 7.28 (m, 5H), 6.24 (s, 1H), 5.14 (s, 2H), 4.35 (d, *J* = 5.6 Hz, 2H), 3.42 (s, 3H), 2.21 (s, 3H), 2.19 – 2.08 (m, 4H), 1.91 (t, *J* = 2.6 Hz, 1H), 1.72 – 1.62 (m, 2H), 1.54 – 1.46 (m, 2H). 13C NMR (101 MHz, CDCl3) *δ* 173.50, 173.02, 147.85, 146.22, 141.52, 137.71, 129.72, 129.04, 128.82, 119.00, 84.50, 73.33, 69.02, 36.72, 35.87, 35.10, 28.48, 25.01, 21.37, 18.63. HRMS (ESI): calcd for C22H26N2O3 [M + H]+ = 367.2016, found [M + H]+ =367.2031.

***N*-((3-hydroxy-1,6-dimethyl-4-oxo-1,4-dihydropyridin-2-yl)methyl)hept-6-ynamide (10d-3):** Compound **1-8** (470.0 mg, 1.28 mmol) was dissolved in 6 mL trifluoroacetic acid and stirred at 50 °C for 4h. After that, 10N NaOH was added dropwise to adjust pH = 5 under ice bath. The mixture was extracted with CH2Cl2 (3×50 mL) and the combined organic layers were washed with brine, dried over NaSO4, filtered, concentrated, and purified by flash column chromatography (DCM:MeOH = 15:1) to afford light red powder **10d-3** (200.0 mg, 65.67%). 1H NMR (400 MHz, DMSO-*d6*) *δ* 8.16 (t, *J* = 4.9 Hz, 1H), 6.12 (s, 1H), 4.42 (d, *J* = 5.0 Hz, 2H), 3.46 (s, 3H), 2.75 (t, *J* = 2.6 Hz, 1H), 2.29 (s, 3H), 2.18 – 2.08 (m, 4H), 1.63 – 1.53 (m, 2H), 1.44 – 1.37 (m, 2H). 13C NMR (101 MHz, DMSO-*d6*) *δ* 172.50, 169.85, 146.54, 146.20, 129.21, 112.79, 84.82, 71.73, 35.92, 34.89, 34.47, 28.04, 24.84, 20.72, 17.90. HRMS (ESI): calcd for C15H20N2O3 [M + H]+ = 277.1547, found [M + H]+ =277.1549. Mp: 179.8−181.3 °C.

***N*-((3-(benzyloxy)-1,6-dimethyl-4-oxo-1,4-dihydropyridin-2-yl)methyl)oct-7-ynamide (1-9):** To a solution of the lithium acetylide ethelenediamine complex (920.0 mg, 8.99 mmol) in DMSO (3 mL) was added 6-bromohexanoic acid (616.0 mg, 3.00 mmol) in DMSO (3 mL) at 0 °C. After stirring at room temperature for 2h, the mixture was poured into brine with ice and acidified with 2N HCl. The aqueous layer was extracted with CH2Cl2 (3×100 mL). The combined organic layers were dried over Na2SO4 and concentrated under reduced pressure. The crude product 7-octynoic acid (420.5 mg, quantitative) dissolved in DMSO was directly used in the next step. Compound **1-6** (502.0 mg, 1.95 mmol), EDCI (449.0 mg, 2.34 mmol), HOBt (316.2 mg, 2.34 mmol), DMAP (286.0 mg, 2.34 mmol) and 7-octynoic acid (420.5 mg, 3.00 mmol) were dissolved in DMSO (8 mL) under nitrogen atmosphere. The mixture was stirred for 12 h at room temperature. Subsequently, the reaction was quenched by saturated aqueous NH4Cl solution (15 mL) and then extracted with CH2Cl2 (3×50 mL). The organic phase was combined together, washed with saturated aqueous NH4Cl (3×100 mL) and dried over Na2SO4. Upon solvent evaporation, the residue was purified by flash column chromatography (DCM:MeOH=40:1) to afford the Colorless oil **1-9** (353.0 mg, 30.93%). 1H NMR (400 MHz, CDCl3) *δ* 7.29 (s, 5H), 6.17 (s, 1H), 5.08 (s, 2H), 4.35 (d, *J* = 5.5 Hz, 2H), 3.40 (s, 3H), 2.19 (s, 3H), 2.16 – 2.11 (m, 4H), 1.90 (t, *J* = 2.6 Hz, 1H), 1.61 – 1.46 (m, 4H), 1.41 – 1.33 (m, 2H). 13C NMR (101 MHz, CDCl3) *δ* 173.23, 173.07, 147.42, 146.02, 141.06, 137.22, 128.85, 128.48, 128.21, 118.37, 84.43, 72.91, 68.35, 36.20, 35.79, 34.67, 28.37, 28.14, 24.98, 20.83, 18.24. HRMS (ESI): calcd for C23H29N2O3 [M + H]+ = 381.2173, found [M + H]+ =381.2209.

***N*-((3-hydroxy-1,6-dimethyl-4-oxo-1,4-dihydropyridin-2-yl)methyl)oct-7-ynamide (10d-4):**The synthetic procedures of compound **10d-4** were similar to compound **10d-3**, using compound **1-9** (290.0 mg, 0.76 mmol) and trifluoroacetic acid (5 mL). The crude product was purified by column chromatography (DCM:MeOH = 20:1) to afford light red powder **10d-4** (130.0 mg, 58.91%). 1H NMR (400 MHz, DMSO-*d6*) *δ* 8.16 (s, 1H), 6.12 (s, 1H), 4.42 (d, *J* = 4.7 Hz, 2H), 3.46 (s, 3H), 2.73 (t, *J* = 2.5 Hz, 1H), 2.28 (s, 3H), 2.22 – 1.94 (m, 4H), 1.58 – 1.37 (m, 4H), 1.35 – 1.24 (m, 2H). 13C NMR (101 MHz, DMSO-*d6*) *δ* 172.66, 169.84, 146.54, 146.20, 129.26, 112.80, 84.97, 71.61, 35.94, 35.38, 34.47, 28.27, 28.15, 25.19, 20.72, 18.06. HRMS (ESI): calcd for C16H22N2O3 [M + H]+ = 291.1703, found [M + H]+ =291.1705. Mp: 184.8−186.0 °C.

***N*-((5-(benzyloxy)-6-(heptanamidomethyl)-1-methyl-4-oxo-1,4-dihydropyridin-2-yl)methyl)hept-6-ynamide (2-10):** The reaction was conducted as described for compound **1-8**, using compound **2-8** (0.50 g, 1.30 mmol) and 6-Heptynoic acid (0.18 mL, 1.43 mmol). The crude product was purified by column chromatography (DCM:MeOH = 20:1) to afford white solid **2-10** (0.61 g, 95.05%). 1H NMR (400 MHz, CDCl3) *δ* 8.18 (t, *J* = 5.0 Hz, 1H), 7.39 – 7.28 (m, 5H), 6.26 (s, 1H), 5.18 (s, 2H), 4.28 (t, *J* = 5.3 Hz, 4H), 3.43 (s, 3H), 2.37 (t, *J* = 7.5 Hz, 2H), 2.20 (td, *J* = 7.1, 2.6 Hz, 2H), 1.99 – 1.90 (m, 3H), 1.83 – 1.74 (m, 2H), 1.61 – 1.47 (m, 4H), 1.32 – 1.24 (m, 6H), 0.87 (t, *J* = 6.9 Hz, 3H). 13C NMR (101 MHz, CDCl3) *δ* 173.27, 172.93, 172.80, 147.94, 145.28, 142.22, 136.62, 129.64, 128.88, 128.86 117.81, 84.09, 72.92, 68.71, 41.01, 36.08, 39.91, 35.46, 34.40, 31.52, 29.03, 28.09, 25.49, 24.70, 22.49, 18.19, 14.05. HRMS (ESI): calcd for C29H39N3O4 [M + H]+ = 494.3013, found [M + H]+ =494.3021.

***N*-((6-(heptanamidomethyl)-5-hydroxy-1-methyl-4-oxo-1,4-dihydropyridin-2-yl)methyl)hept-6-ynamide (10d-5):** The synthetic procedures of compound **10d-5** were similar to compound **10d-3**, using compound **2-10** (0.50 g, 1.01 mmol) and trifluoroacetic acid (10 mL). The crude product was purified by column chromatography (DCM:MeOH = 20:1) to afford light red powder **10d-5** (0.26 g, 63.80%). 1H NMR (400 MHz, DMSO-*d6*) *δ* 8.38 (s, 1H), 8.15 (t, *J* = 4.5 Hz, 1H), 6.12 (s, 1H), 4.43 (d, *J* = 4.7 Hz, 2H), 4.25 (d, *J* = 5.4 Hz, 2H), 3.49 (s, 3H), 2.75 (t, *J* = 2.4 Hz, 1H), 2.27 – 1.99 (m, 6H), 1.76 – 1.55 (m, 2H), 1.55 – 1.41 (m, 4H), 1.23 (s, 6H), 0.85 (t, *J* = 6.7 Hz, 3H). 13C NMR (101 MHz, DMSO-*d6*) *δ* 172.78, 172.58, 169.84, 146.54, 146.44, 129.91, 111.23, 84.75, 71.76, 35.51, 35.29, 35.06, 34.36, 31.46, 28.83, 28.06, 25.66, 24.81, 22.45, 17.93, 14.39. HRMS (ESI): calcd for C22H33N3O4 [M + H]+ = 404.2544, found [M + H]+ =404.2541. Mp: 235.6−237.0 °C.

**3-(3-(But-3-yn-1-yl)-3*H*-diazirin-3-yl)-*N*-phenylpropanamide (NP):** Negative Probe **NP** was synthesized by modification of previously published procedures3. Aniline (0.033 mL, 0.36 mmol), EDCI (69.0 mg, 0.36 mmol), HOBt (48.6 mg, 0.36 mmol), DMAP (44.0 mg, 0.36 mmol) and 3-(3-(but-3-yn-1-yl)-3H-diazirin-3-yl)propanoic acid (50.0 mg, 0.30 mmol) were dissolved in dichloromethane (5 mL) under nitrogen atmosphere. The mixture was stirred for 12 h at room temperature in the dark. Subsequently, the reaction was quenched by saturated aqueous NH4Cl solution (10 mL) and then extracted with CH2Cl2 (2×50 mL). The organic phase was combined together, washed with brine and dried over Na2SO4. Upon solvent evaporation, the residue was purified by flash column chromatography (PE:EA=5:1) to afford Off white solid **NP** (68.0 mg, 93.94%). 1H NMR (400 MHz, CDCl3) *δ* 7.82 (s, 1H), 7.40 (d, *J* = 7.9 Hz, 2H), 7.21 (t, *J* = 7.6 Hz, 2H), 7.01 (t, *J* = 7.3 Hz, 1H), 2.02 (t, *J* = 7.6 Hz, 2H), 1.95 – 1.89 (m, 3H), 1.80 (t, *J* = 7.6 Hz, 2H), 1.55 (t, *J* = 7.2 Hz, 2H). 13C NMR (101 MHz, CDCl3) *δ* 169.95, 137.72, 129.00, 124.55, 120.32, 82.75, 69.38, 32.33, 31.22, 28.30, 27.88, 13.29.

***N*-benzylhept-6-ynamide (NP-1):** The reaction was conducted as described for compound **1-8**, using benzylamine (0.18 mL, 1.71 mmol) and 6-Heptynoic acid (0.19 mL, 1.50 mmol). The crude product was purified by column chromatography (PE:EA=3:1) to afford white solid **NP-1** (248.0 mg, 76.79%). 1H NMR (400 MHz, CDCl3) *δ* 7.42 – 7.21 (m, 5H), 6.02 (s, 1H), 4.43 (d, *J* = 5.7 Hz, 2H), 2.28 – 2.17 (m, 4H), 1.96 (t, *J* = 2.6 Hz, 1H), 1.84 – 1.74 (m, 2H), 1.63 – 1.53 (m, 2H). 13C NMR (101 MHz, CDCl3) *δ* 172.53, 138.37, 128.71, 127.81, 127.50, 84.08, 68.66, 43.58, 36.05, 27.97, 24.78, 18.20. HRMS (ESI): calcd for C14H17NO[M + H]+ = 216.1383, found [M + H]+ =216.1381. Mp: 60.6−61.5 °C.

***N*-benzyloct-7-ynamide (NP-2):** The synthetic procedures of compound **NP-2** were similar to compound **1-9**. The crude product was purified by column chromatography (PE:EA=3:1) to afford light yellow solid **NP-2** (63.0 mg, 15.43%). 1H NMR (400 MHz, CDCl3) *δ* 7.36 – 7.22 (m, 5H), 5.95 (s, 1H), 4.41 (d, *J* = 5.7 Hz, 2H), 2.23 – 2.14 (m, 4H), 1.91 (t, *J* = 2.6 Hz, 1H), 1.70 – 1.62 (m, 2H), 1.56 – 1.49 (m, 2H), 1.46 – 1.39 (m, 2H). 13C NMR (101 MHz, CDCl3) *δ* 172.77, 138.42, 128.70, 127.81, 127.48, 84.40, 68.39, 43.57, 36.53, 28.35, 28.14, 25.20, 18.27. HRMS (ESI): calcd for C15H19NO[M + H]+ = 230.1539, found [M + H]+ =230.1538. Mp: 43.6−45.1 °C.

1H NMR spectra, 13C NMR spectra and HRMS of compounds.

Supplementary Figure 6. 1H NMR spectrum of compound 1-7 in Chloroform-*d* (400 MHz).

**
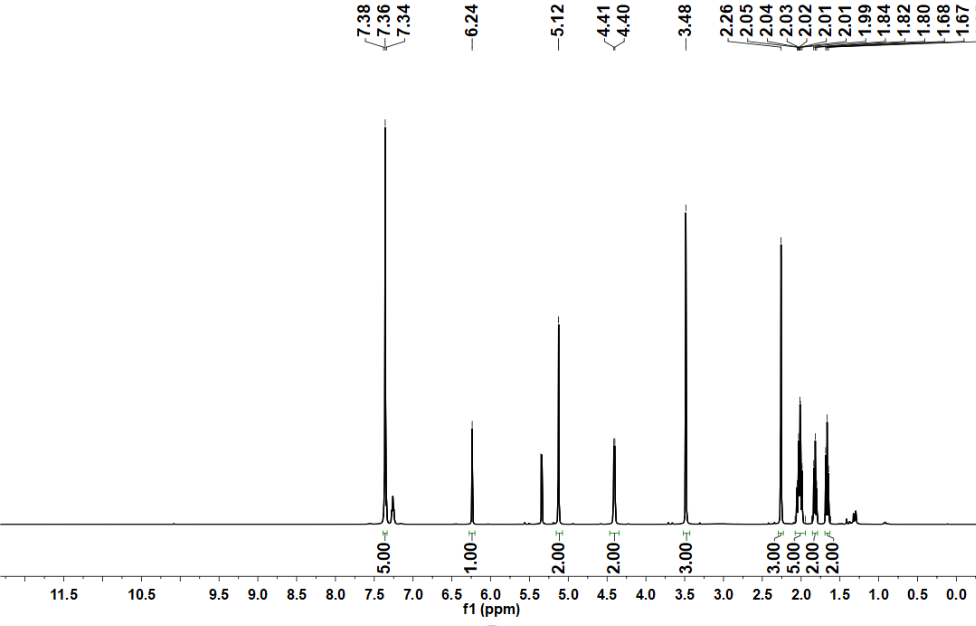
**

Supplementary Figure 7. **13C** NMR spectrum of compound 1-7 in Chloroform-*d* (101 MHz).


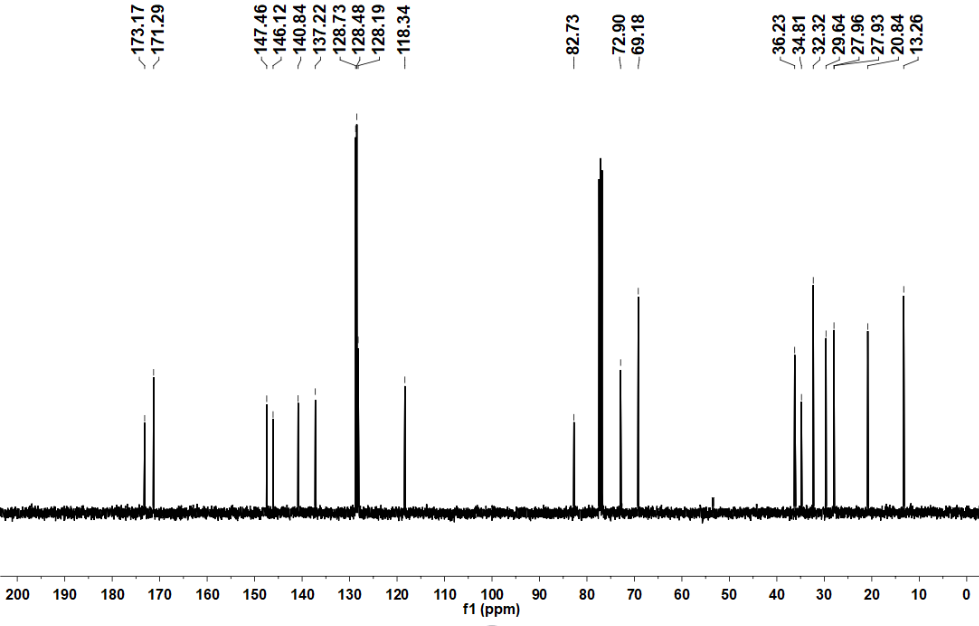


Supplementary Figure 8. 1H NMR spectrum of compound 10d-1 in DMSO-*d6*(400 MHz).


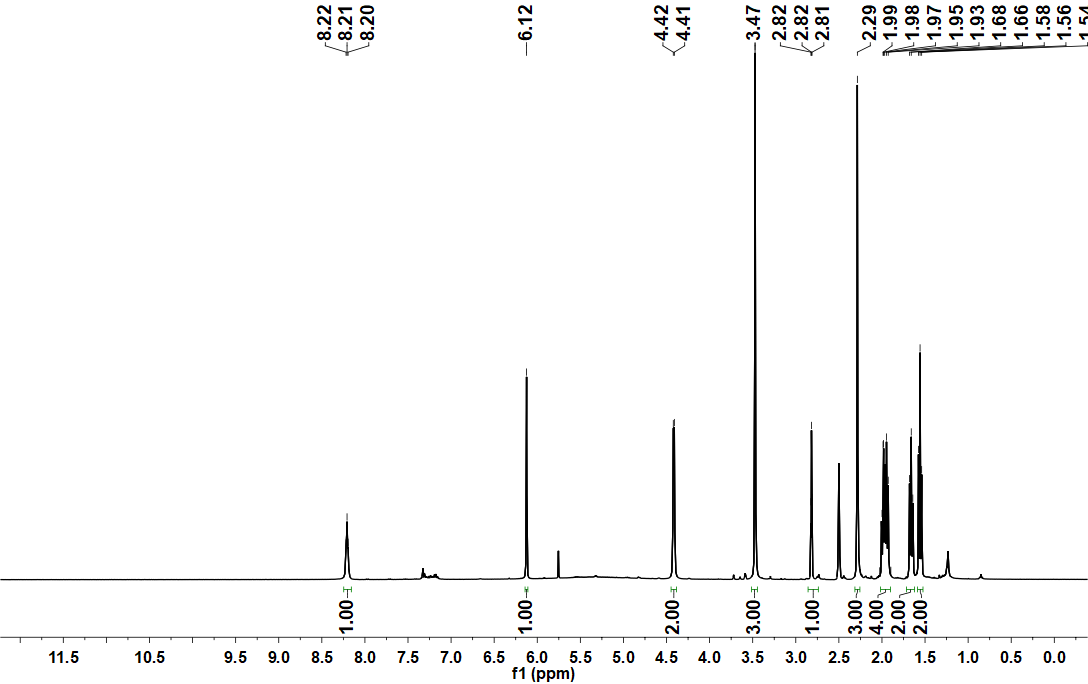


Supplementary Figure 9. **13C** NMR spectrum of compound 10d-1 in DMSO-*d6* (101 MHz).


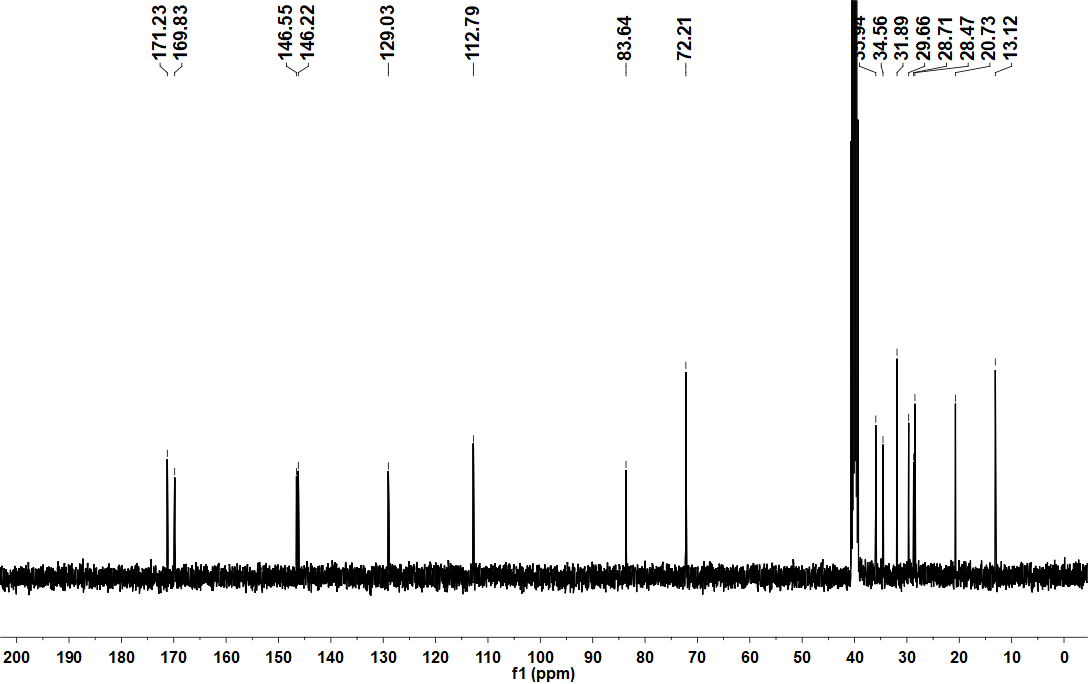


Supplementary Figure 10. 1H NMR spectrum of compound 1-8 in Chloroform-*d* (400 MHz).


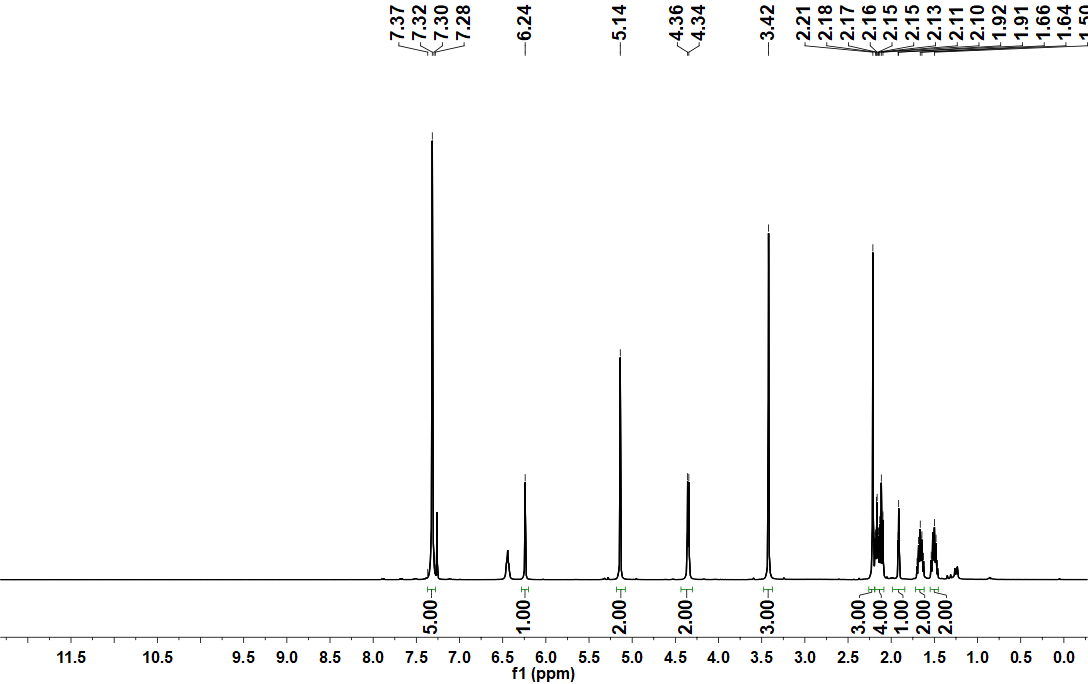


Supplementary Figure 11. **13C** NMR spectrum of compound 1-8 in Chloroform-*d* (101 MHz).


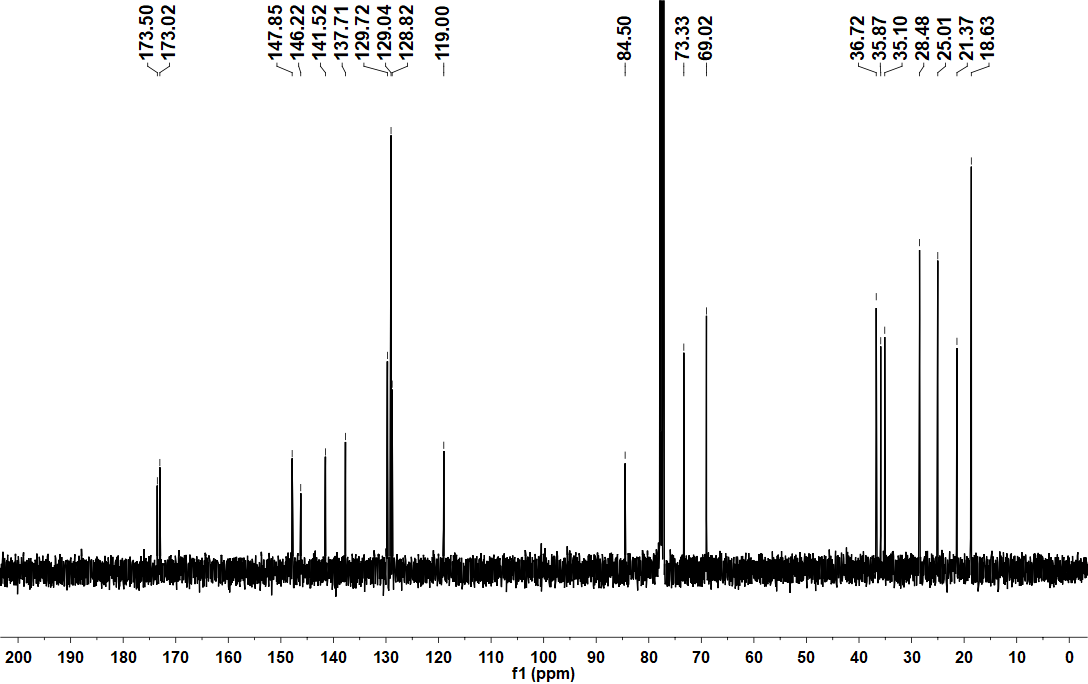


Supplementary Figure 12. 1H NMR spectrum of compound 10d-3 in DMSO-*d6* (400 MHz).

**
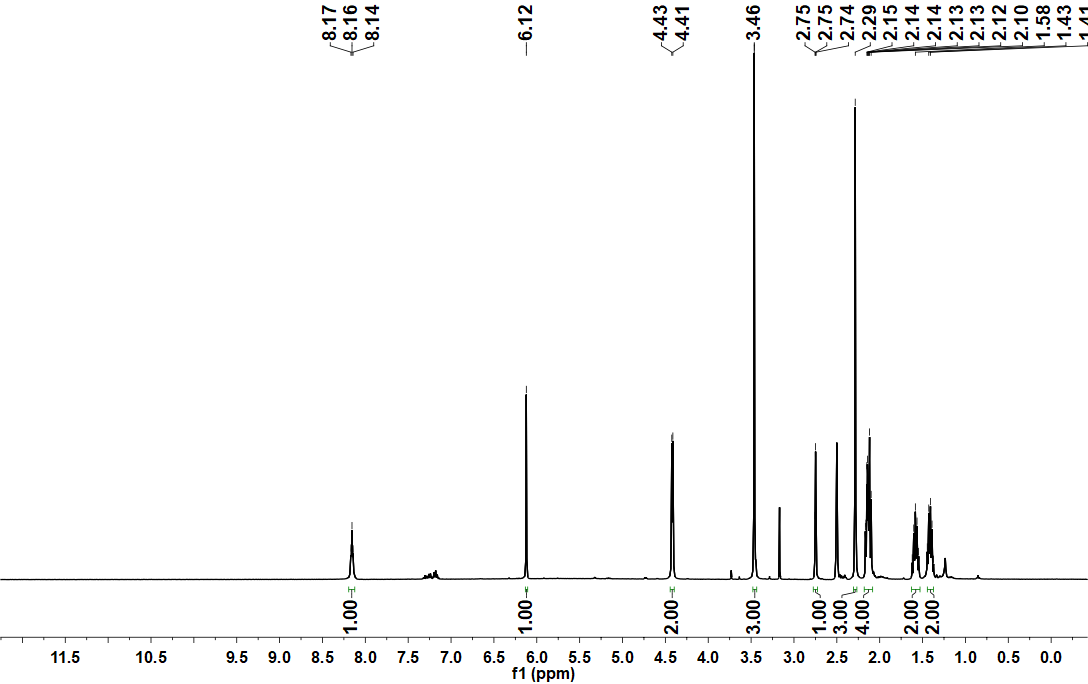
**

Supplementary Figure 13. **13C** NMR spectrum of compound 10d-3 in DMSO-*d6* (101 MHz).

**
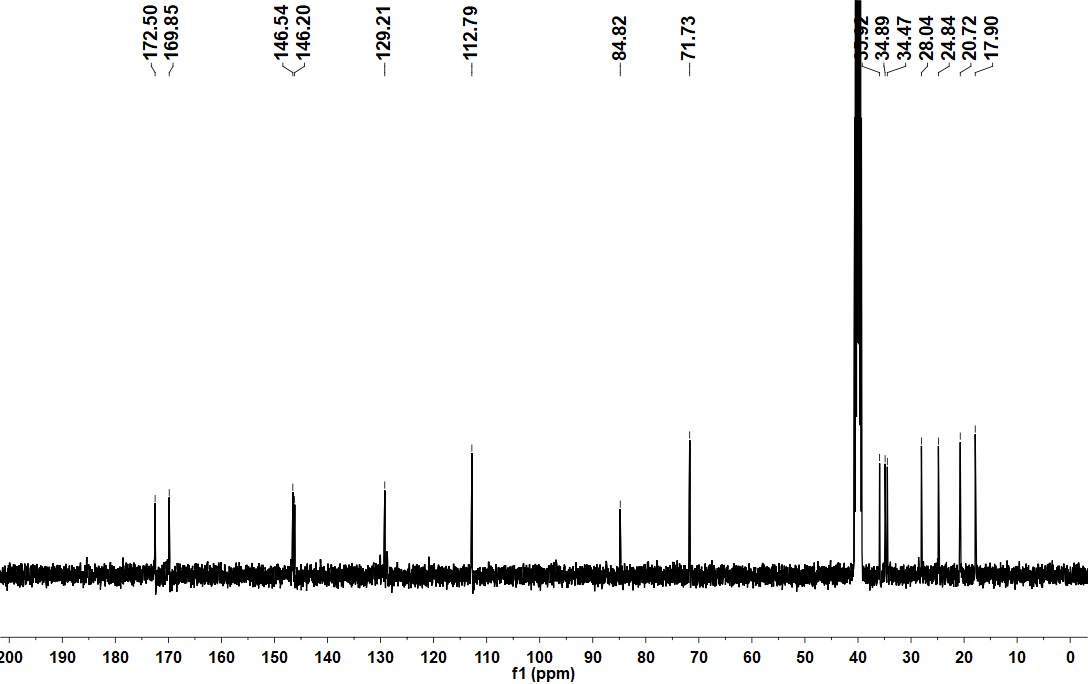
**

Supplementary Figure 14. 1H NMR spectrum of compound 1-9 in Chloroform-*d* (400 MHz).


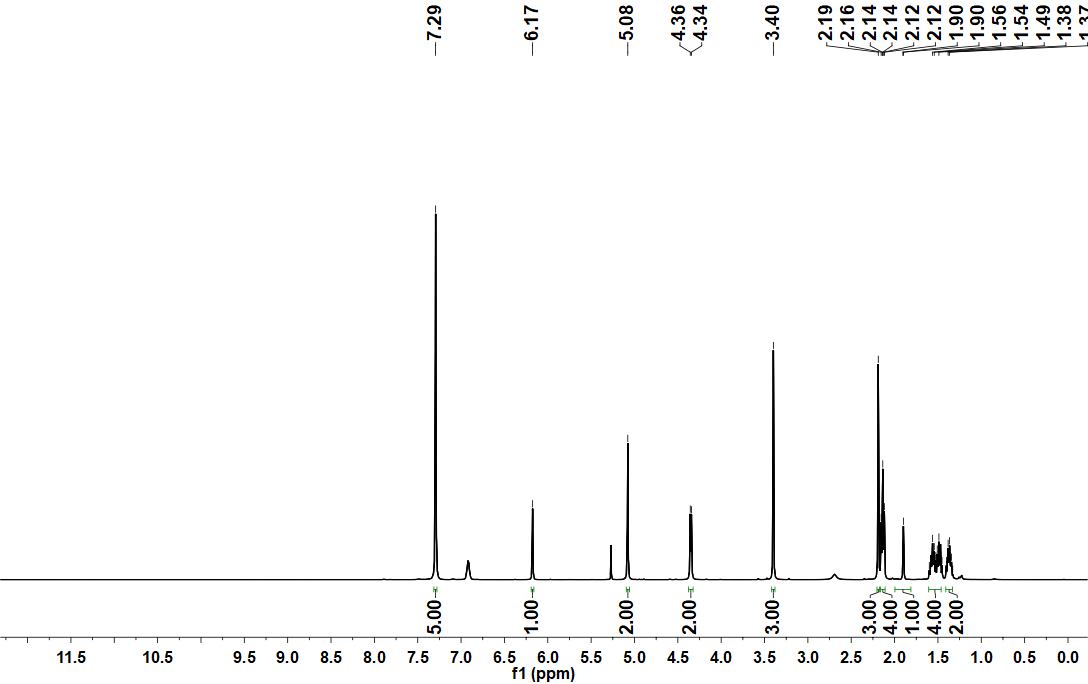


Supplementary Figure 15. **13C** NMR spectrum of compound 1-9 in Chloroform-*d* (101 MHz).


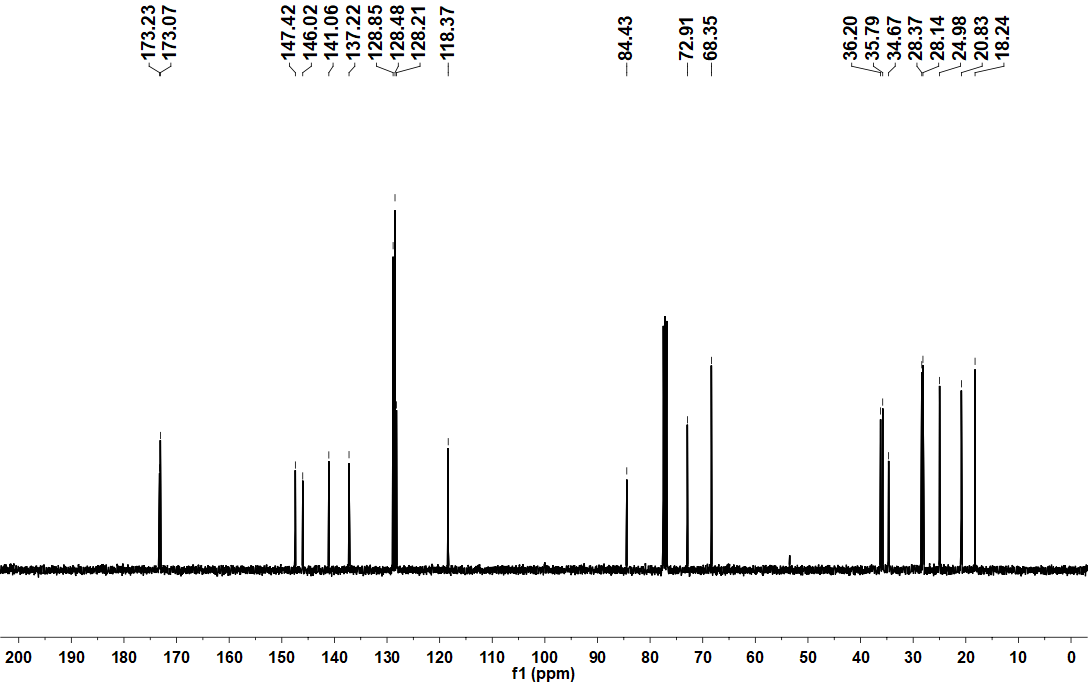


Supplementary Figure 16. 1H NMR spectrum of compound 10d-4 in DMSO-*d6* (400 MHz).


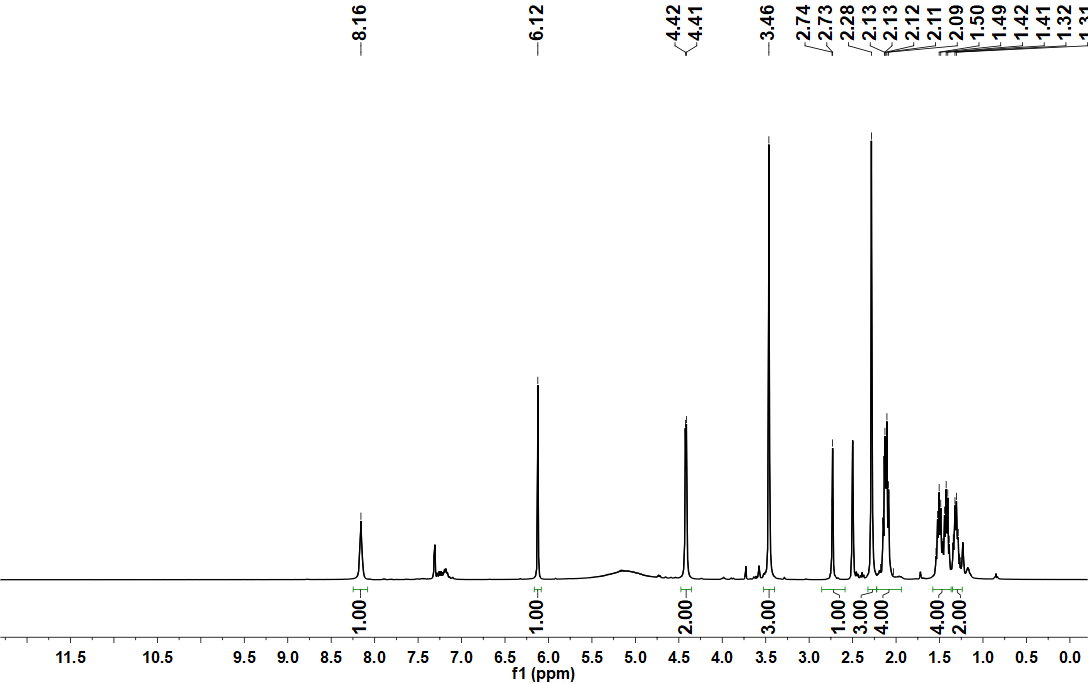


Supplementary Figure 17. **13C** NMR spectrum of compound 10d-4 in DMSO-*d6* (101 MHz).


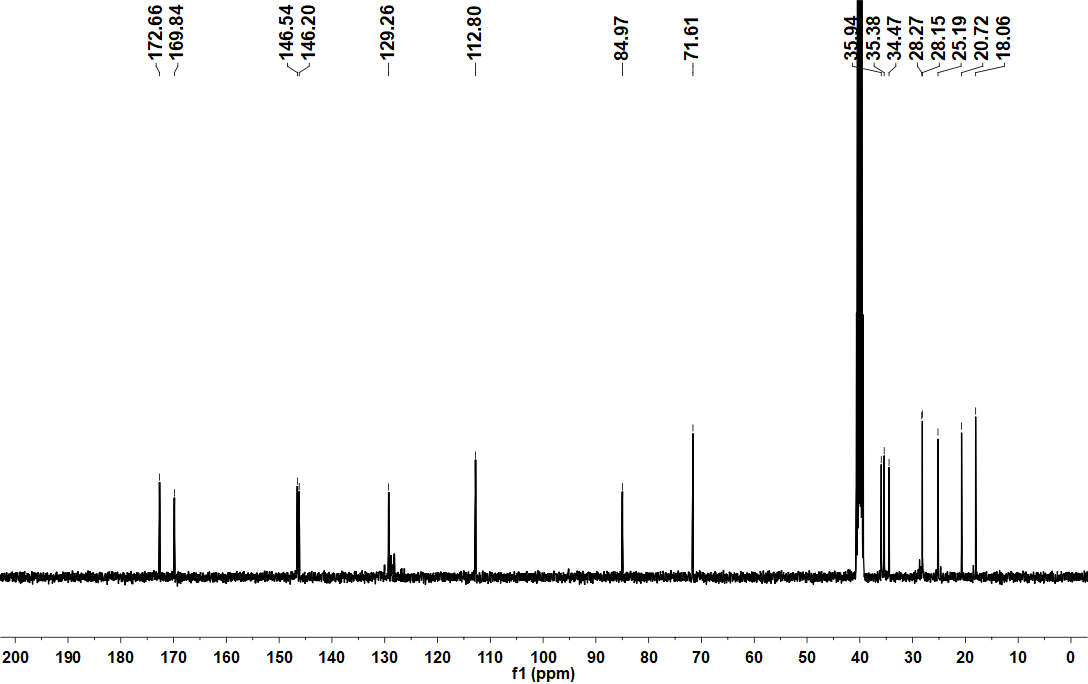


Supplementary Figure 18. 1H NMR spectrum of compound 2-1 in Chloroform-*d* (400 MHz).

**
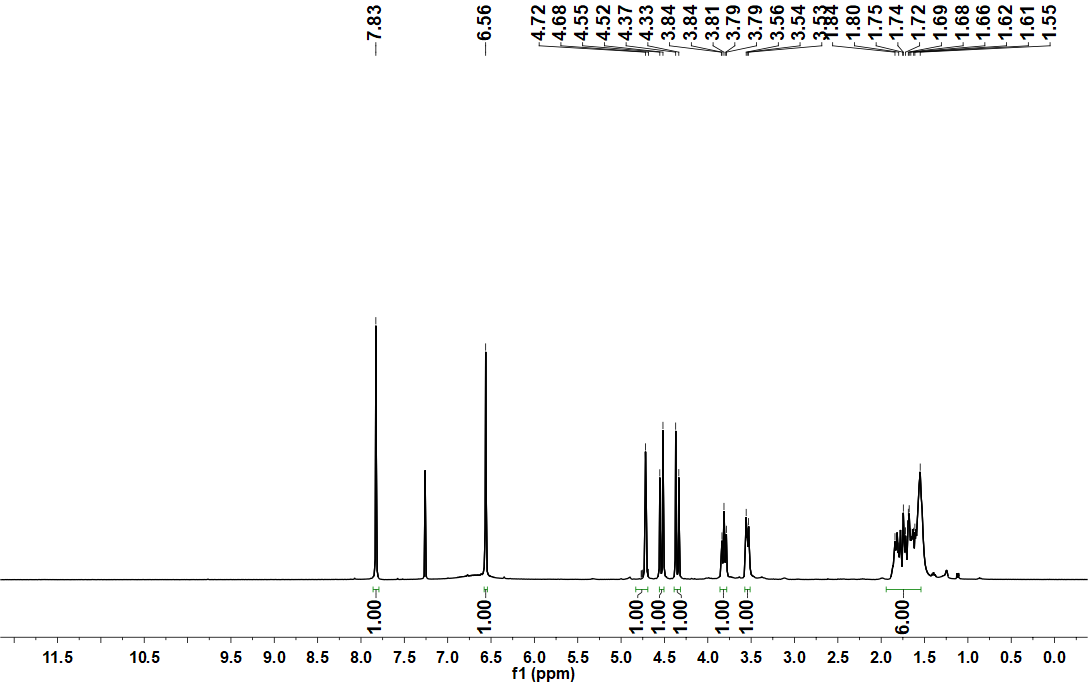
**

Supplementary Figure 19. **13C** NMR spectrum of compound 2-1 in Chloroform-*d* (101 MHz).

**
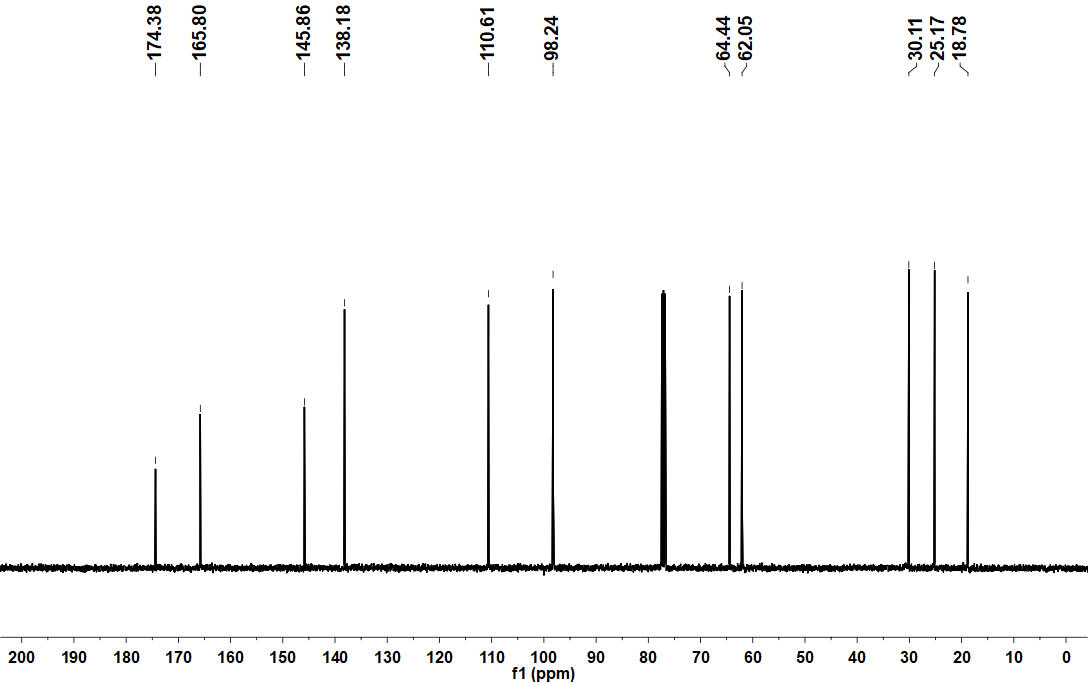
**

Supplementary Figure 20. 1H NMR spectrum of compound 2-2 in DMSO-*d6* (400 MHz).


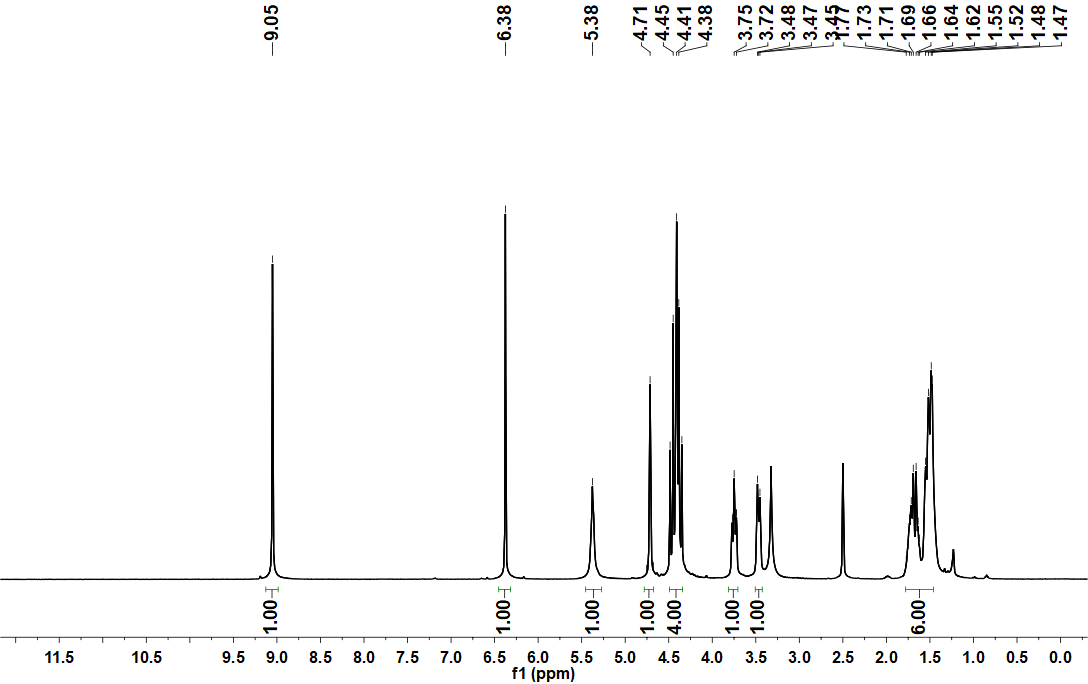


Supplementary Figure 21. **13C** NMR spectrum of compound 2-2 in DMSO-*d6* (101 MHz).

**
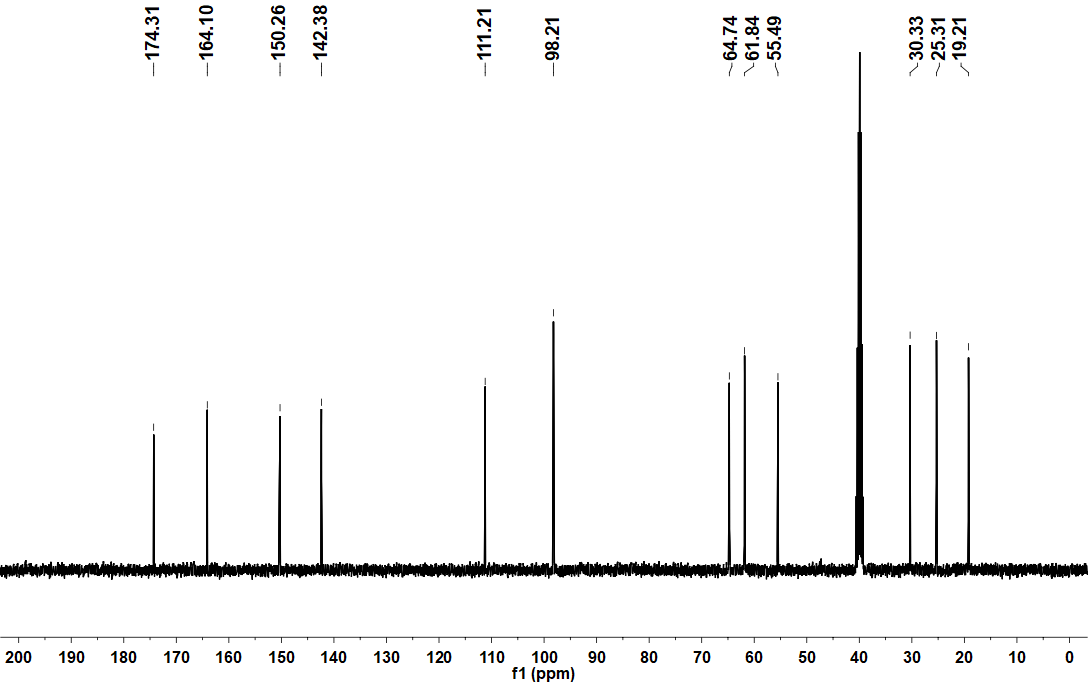
**

Supplementary Figure 22. 1H NMR spectrum of compound 2-3 in Chloroform-*d* (400 MHz).


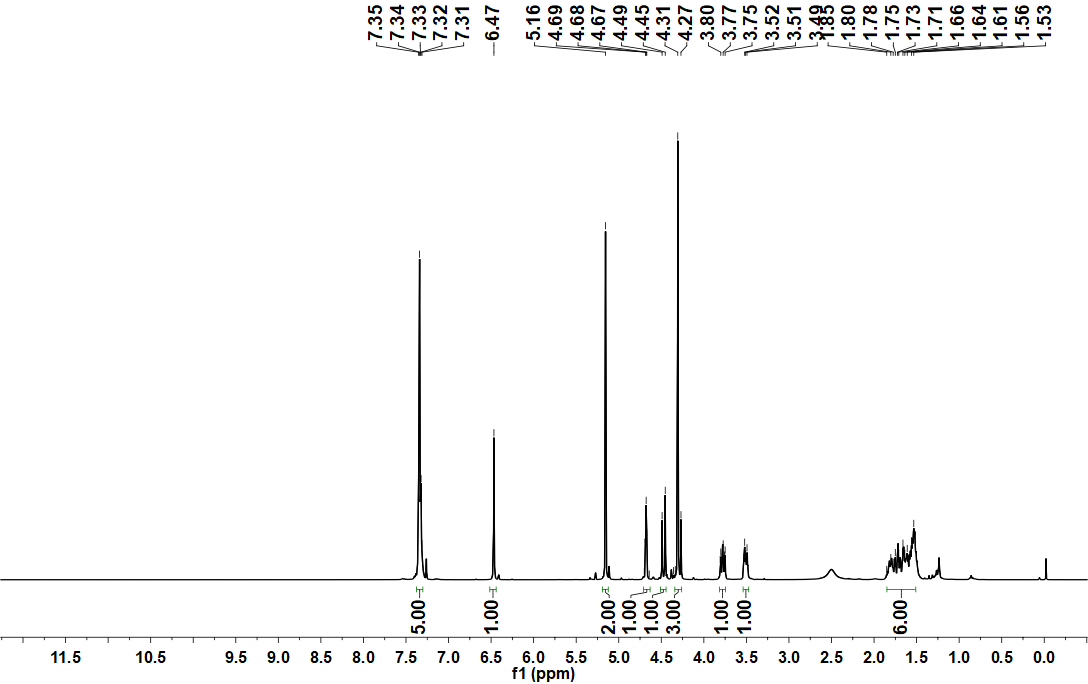


Supplementary Figure 23. **13C** NMR spectrum of compound 2-3 in Chloroform-*d* (101 MHz).


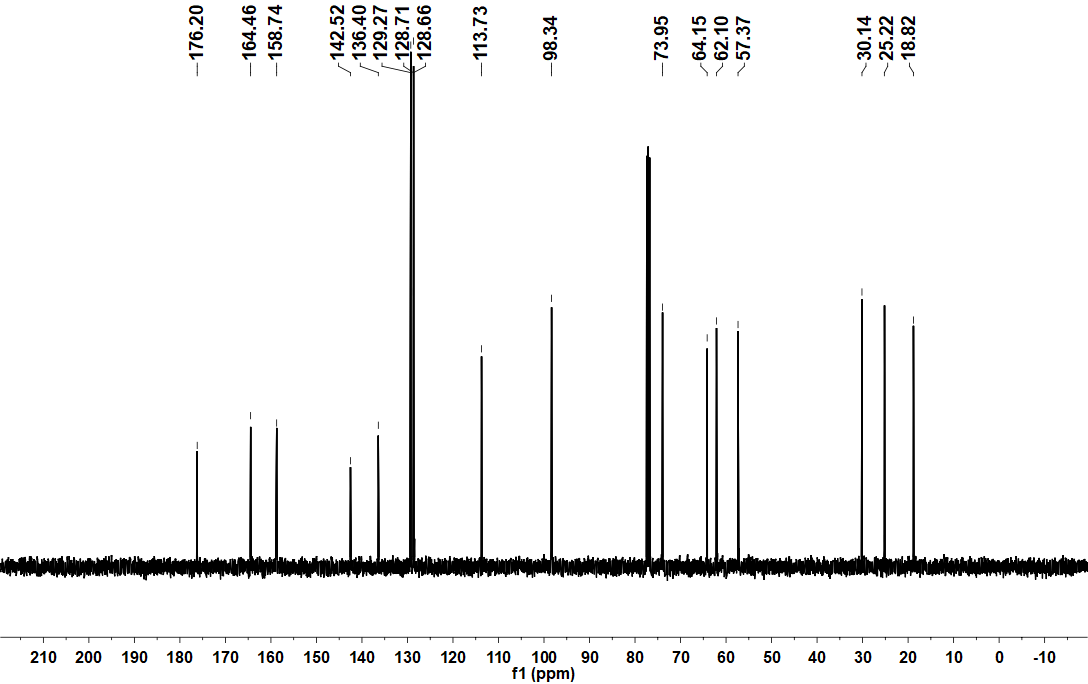


Supplementary Figure 24. 1H NMR spectrum of compound 2-4 in Chloroform-*d* (400 MHz).

**
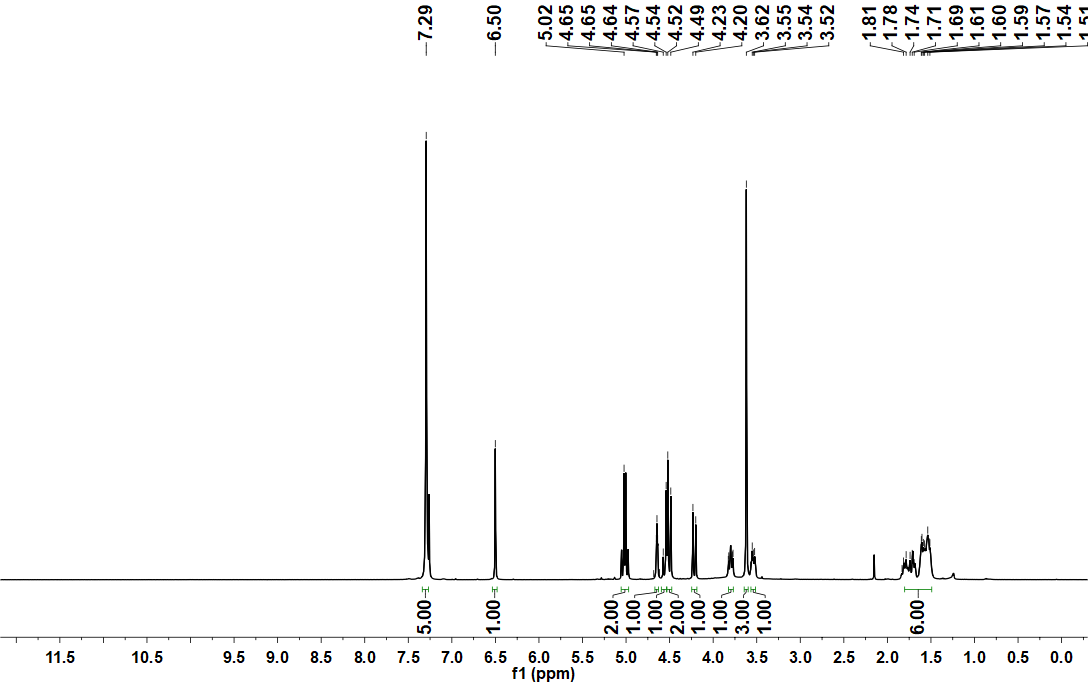
**

Supplementary Figure 25. **13C** NMR spectrum of compound 2-4 in Chloroform-*d* (101 MHz).


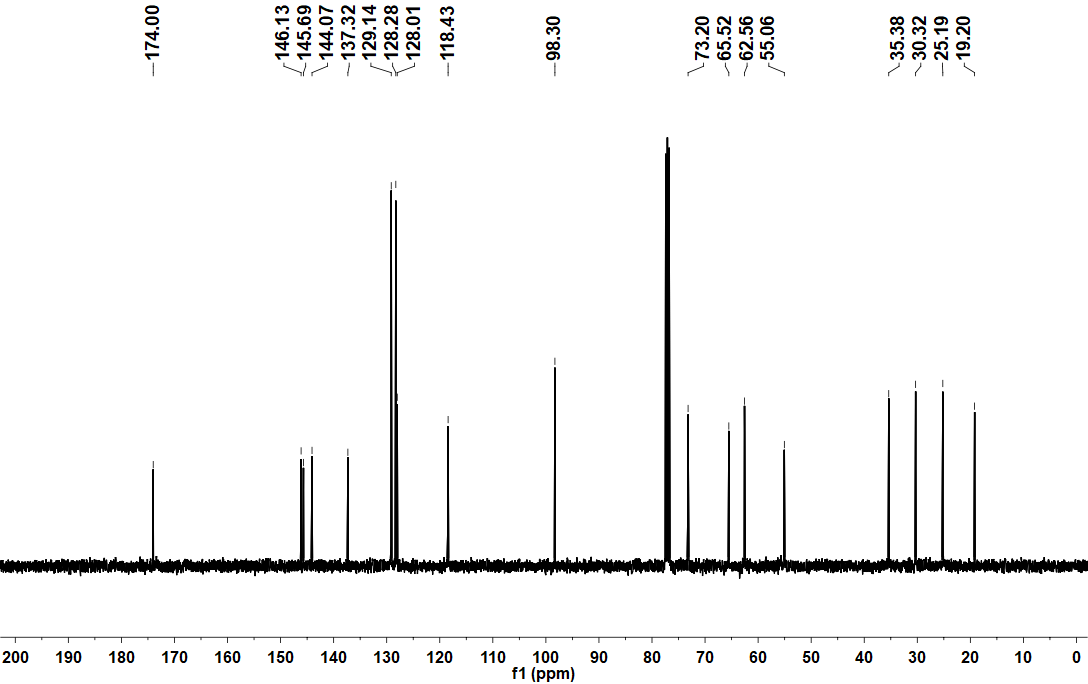


Supplementary Figure 26. 1H NMR spectrum of compound 2-5 in Chloroform-*d* (400 MHz).

**
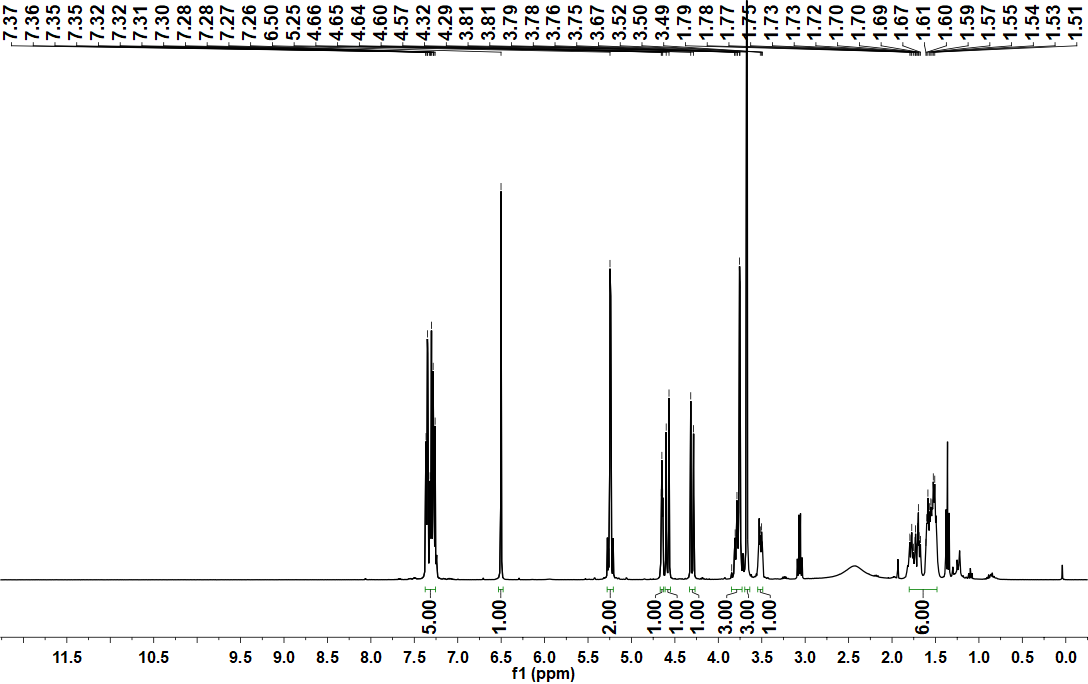
**

Supplementary Figure 27. **13C** NMR spectrum of compound 2-5 in Chloroform-*d* (101 MHz).


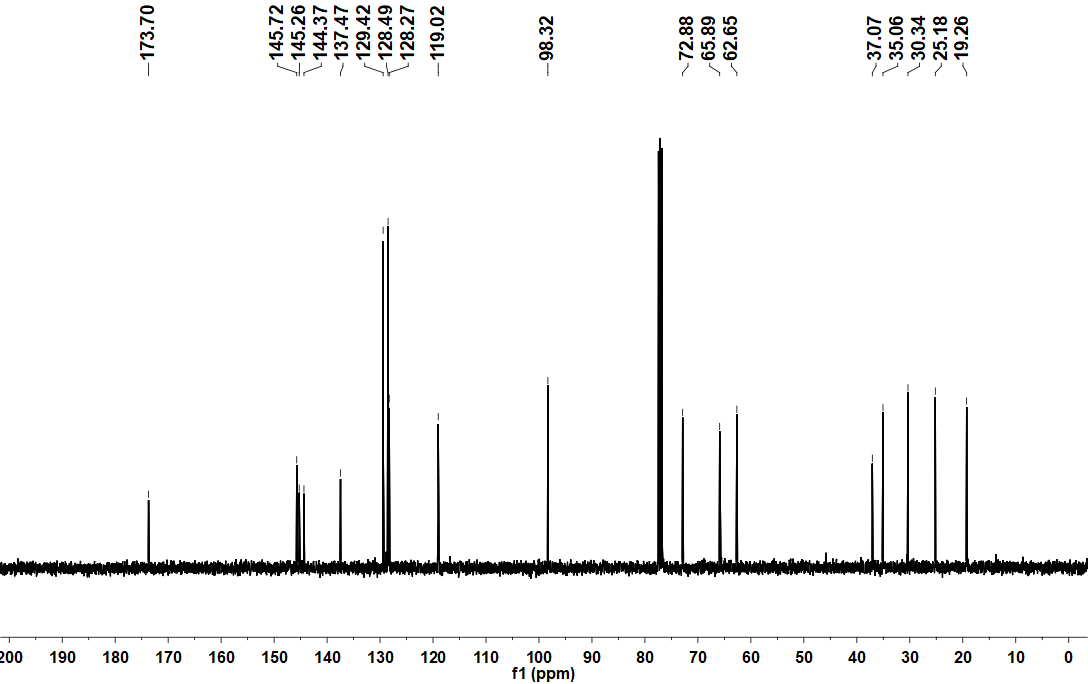


Supplementary Figure 28. 1H NMR spectrum of compound 2-6 in Chloroform-*d* (400 MHz).


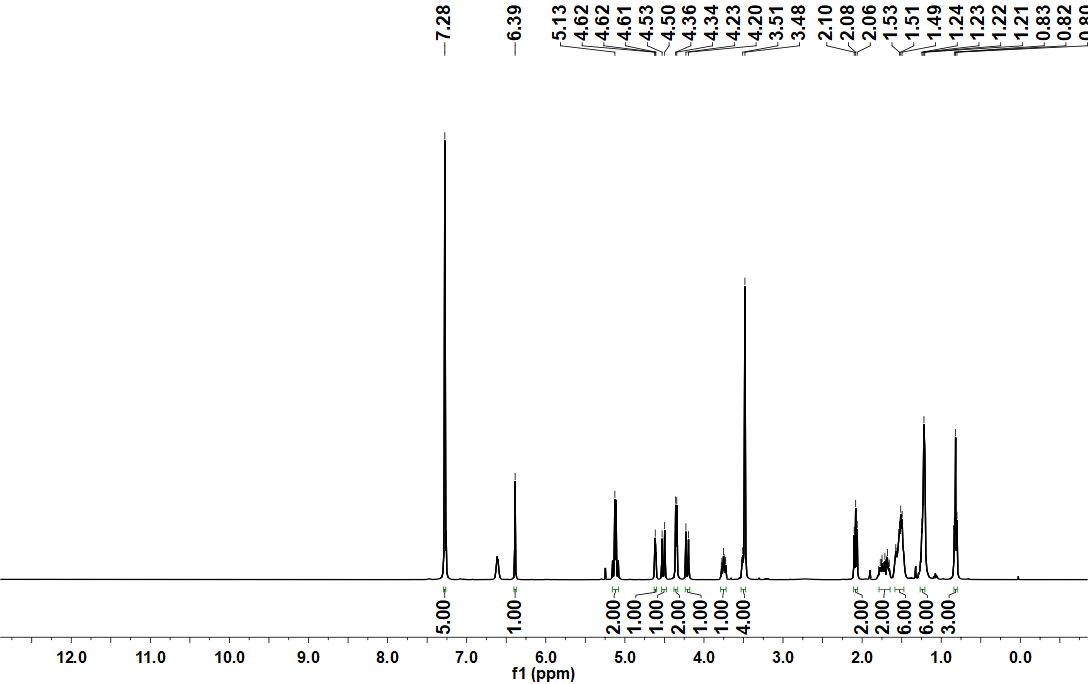


Supplementary Figure 29. **13C** NMR spectrum of compound 2-6 in Chloroform-*d* (101 MHz).


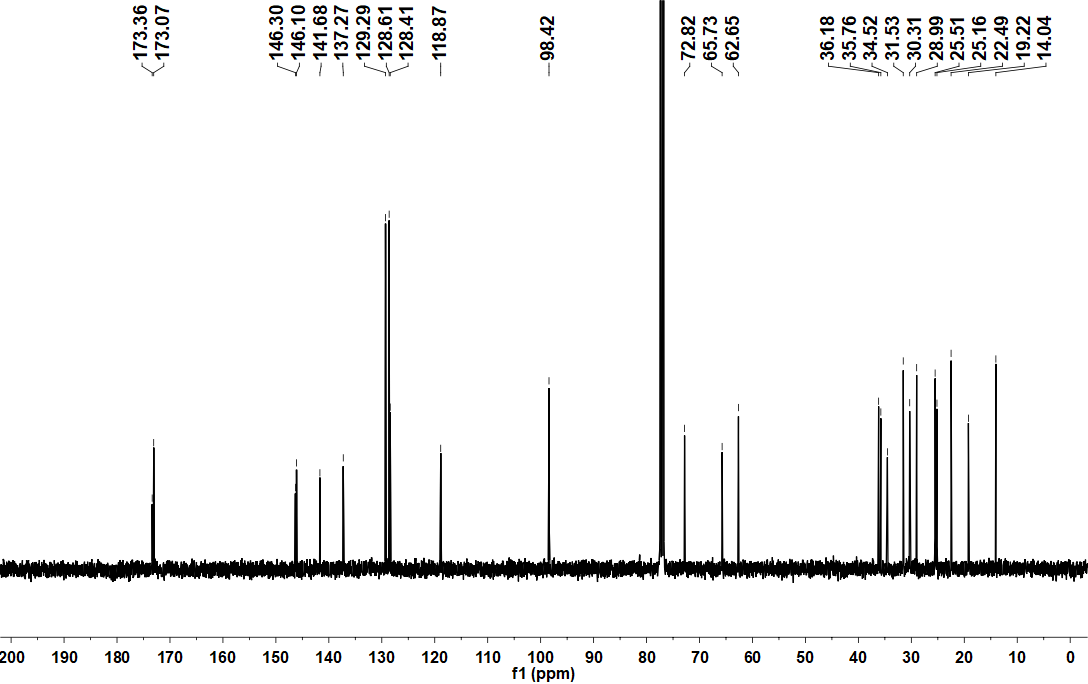


Supplementary Figure 30. 1H NMR spectrum of compound 2-7 in DMSO-*d6* (400 MHz).


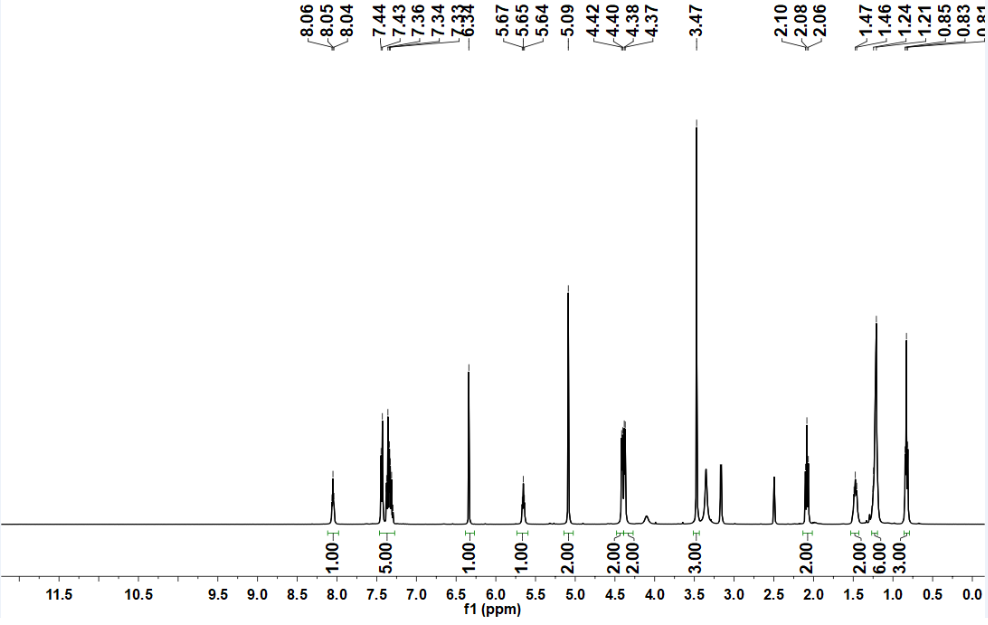


Supplementary Figure 31. **13C** NMR spectrum of compound 2-7 in DMSO-*d6* (101 MHz).


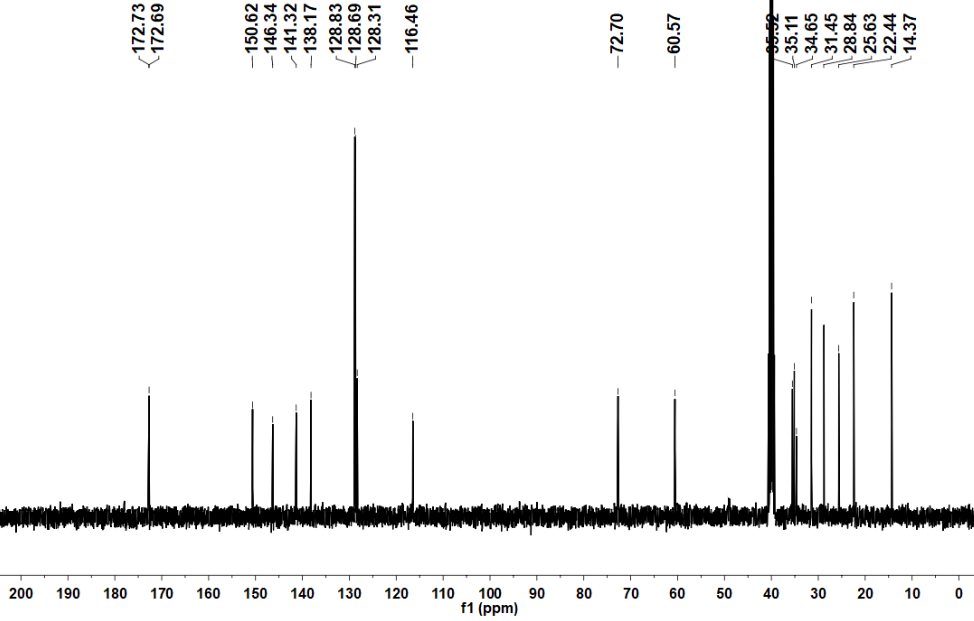


Supplementary Figure 32. 1H NMR spectrum of compound 2-8 in DMSO-*d6*(400 MHz).


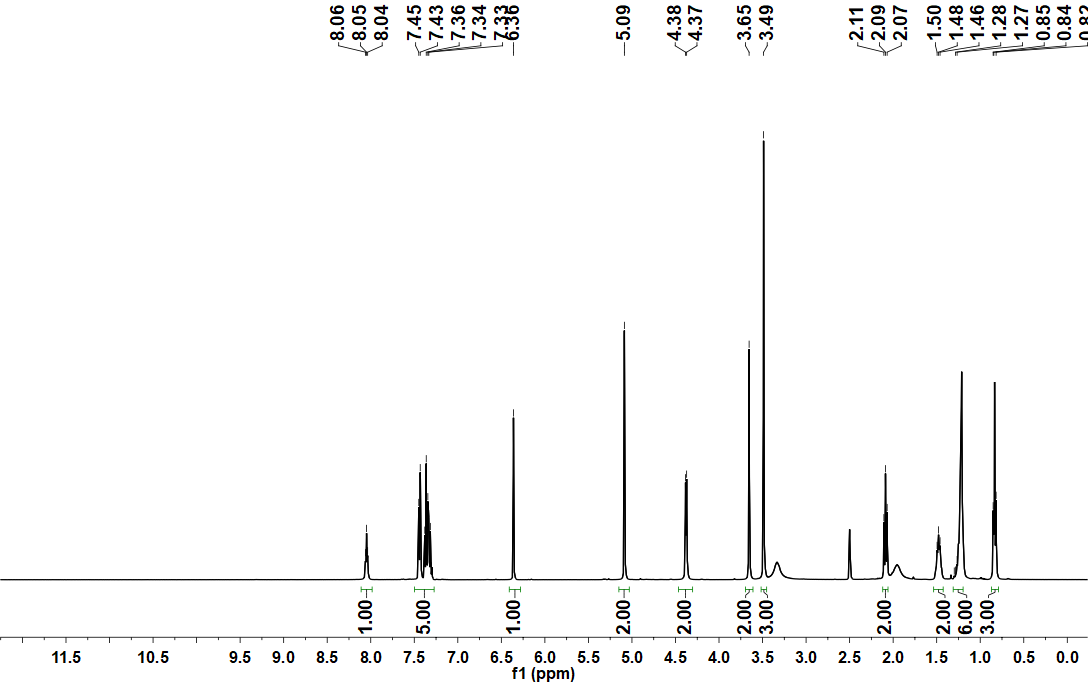


Supplementary Figure 33. **13C** NMR spectrum of compound 2-8 in DMSO-*d6* (101 MHz).


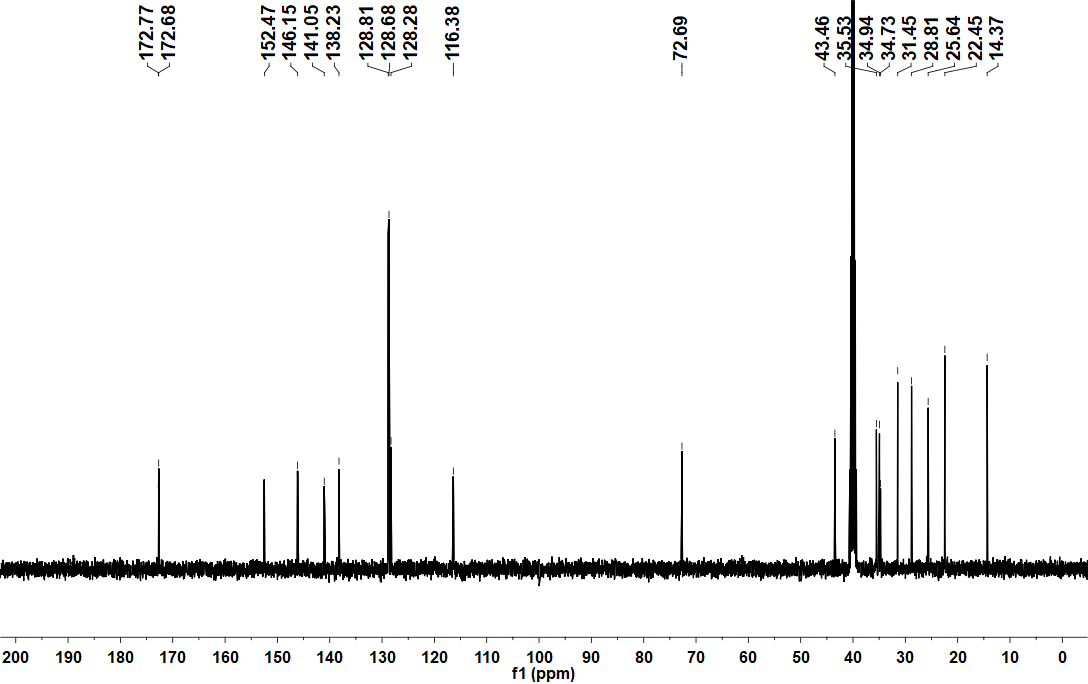


Supplementary Figure 34. 1H NMR spectrum of compound 2-9 in Chloroform-*d* (400 MHz).

**
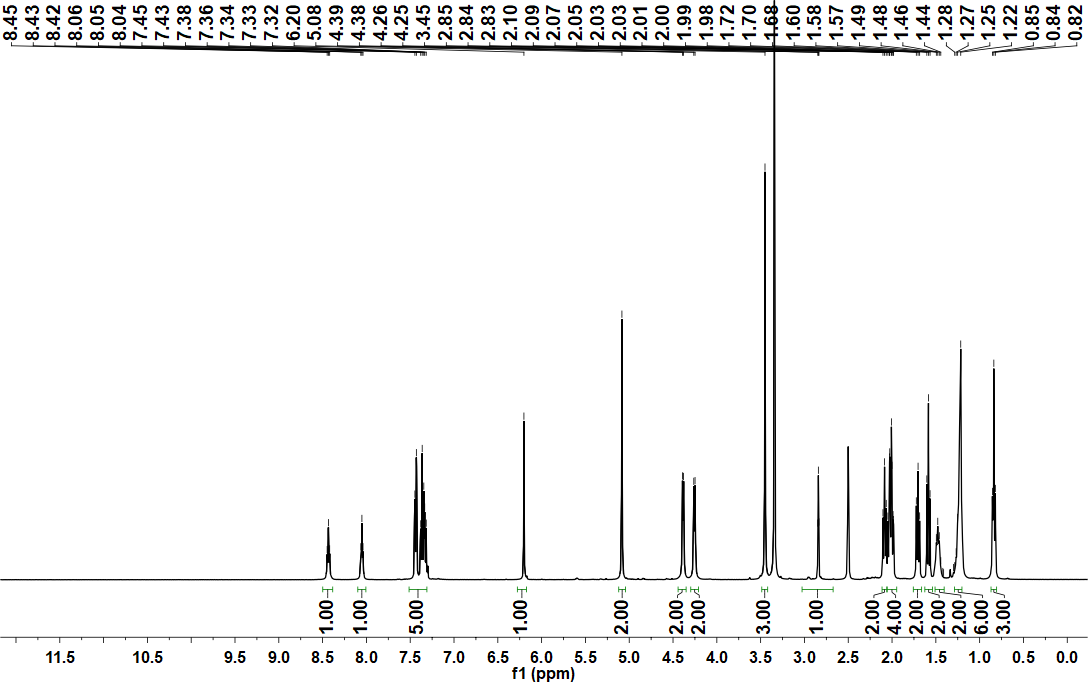
**

Supplementary Figure 35. **13C** NMR spectrum of compound 2-9 in Chloroform-*d* (101 MHz).

**
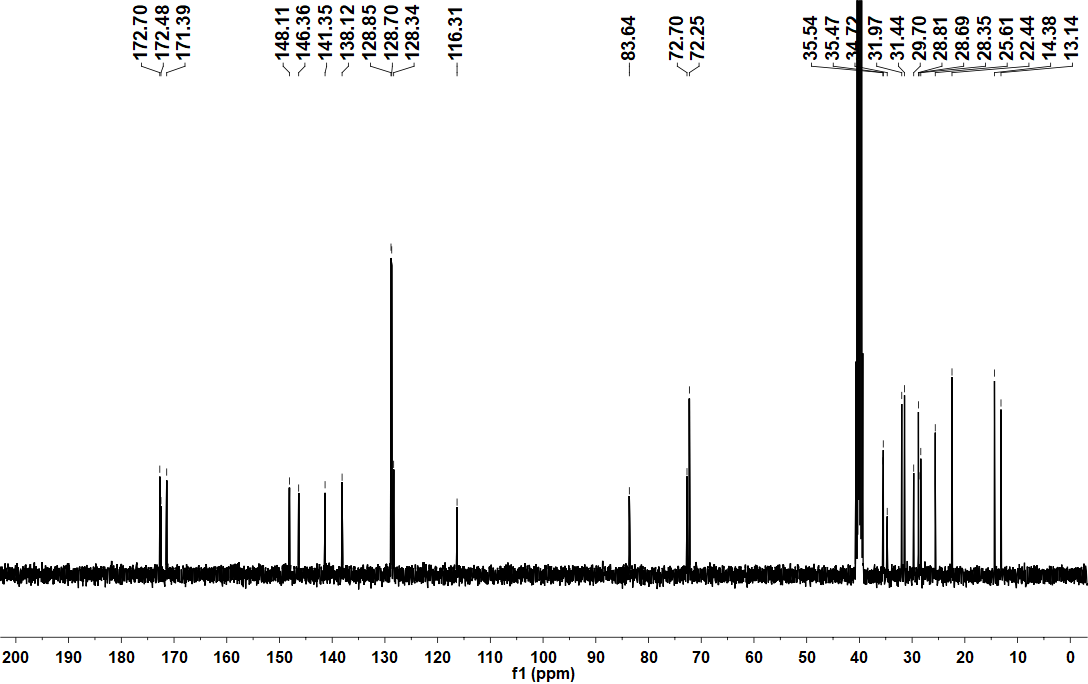
**

Supplementary Figure 36. 1H NMR spectrum of compound 10d-2 in DMSO-*d6* (400 MHz).


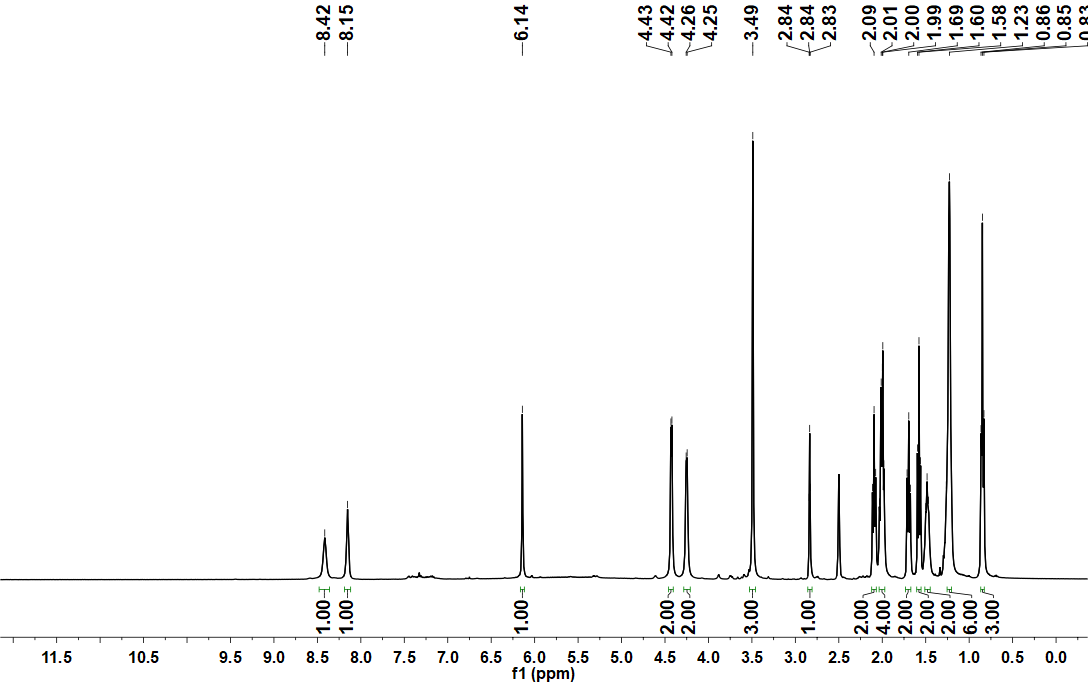


Supplementary Figure 37. **13C** NMR spectrum of compound 10d-2 in DMSO-*d6* (101 MHz).


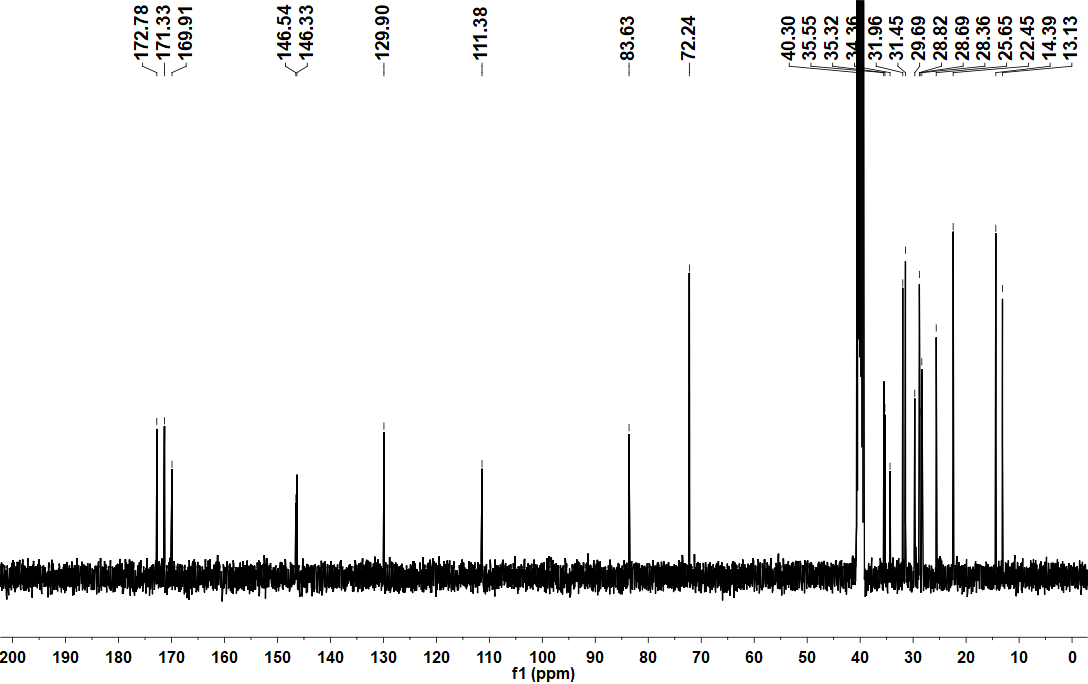


Supplementary Figure 38. 1H NMR spectrum of compound 2-10 in Chloroform-*d* (400 MHz).


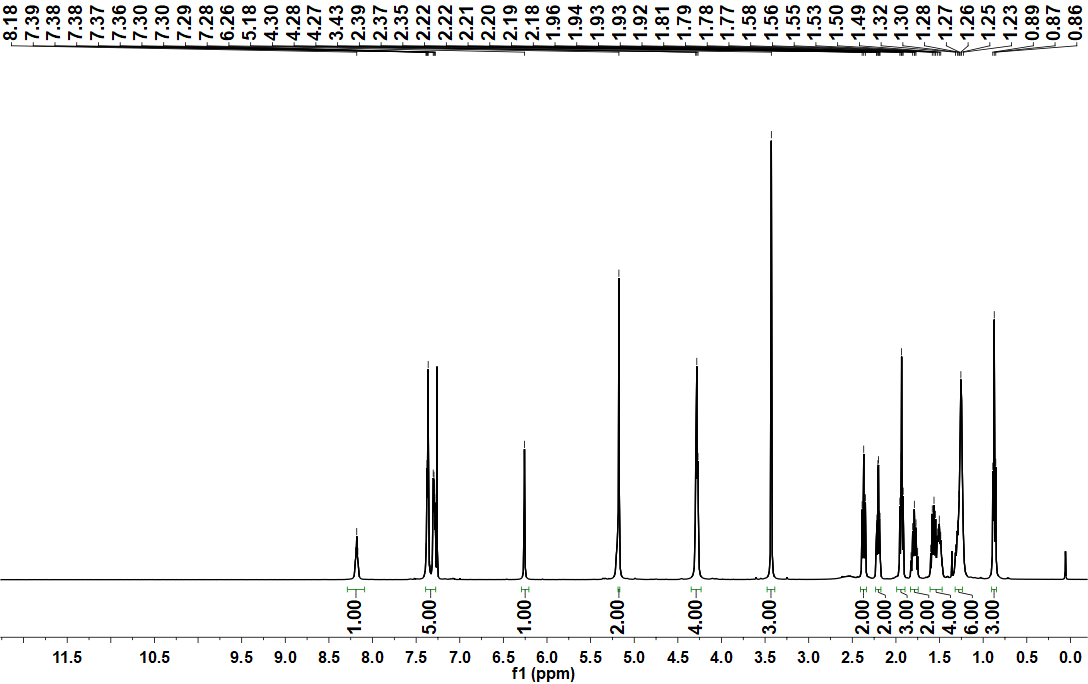


Supplementary Figure 39. **13C** NMR spectrum of compound 2-10 in Chloroform-*d* (101 MHz).


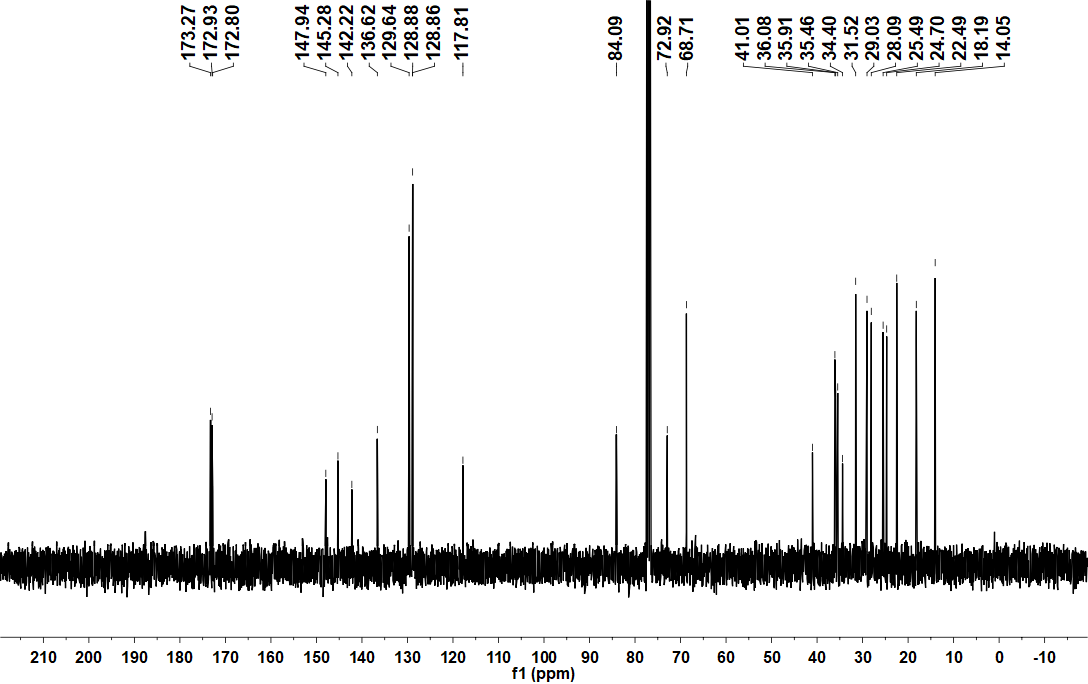


Supplementary Figure 40. 1H NMR spectrum of compound 10d-5 in DMSO-*d6* (400 MHz).


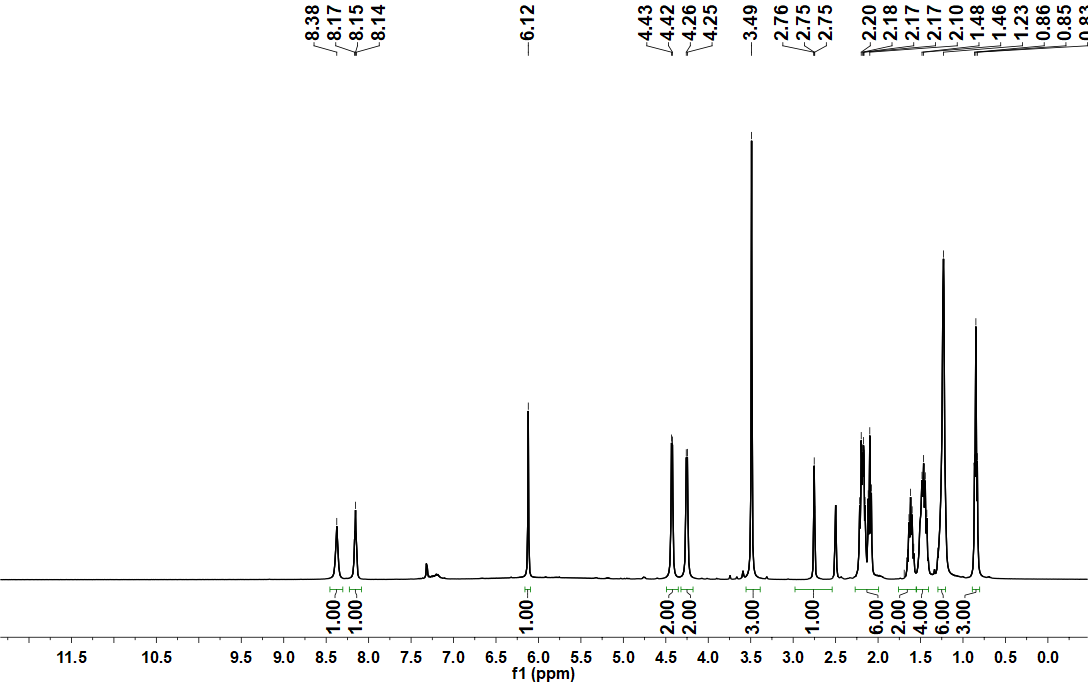


Supplementary Figure 41. **13C** NMR spectrum of compound 10d-5 in DMSO-*d6* (101 MHz).


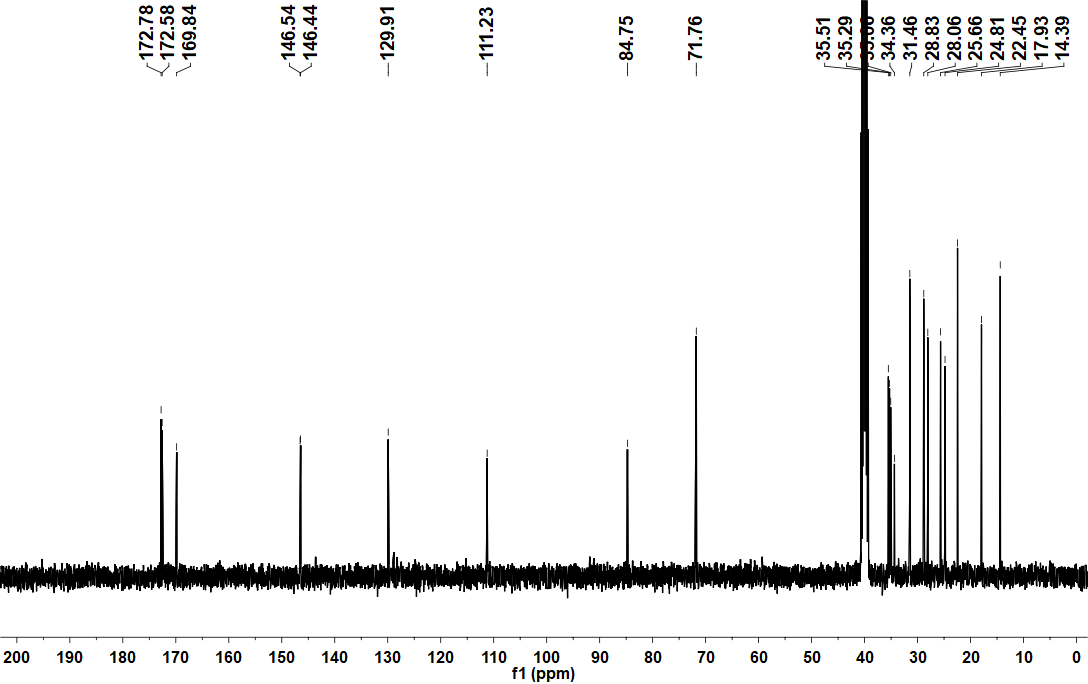


Supplementary Figure 42. 1H NMR spectrum of compound NP in Chloroform-*d* (400 MHz).


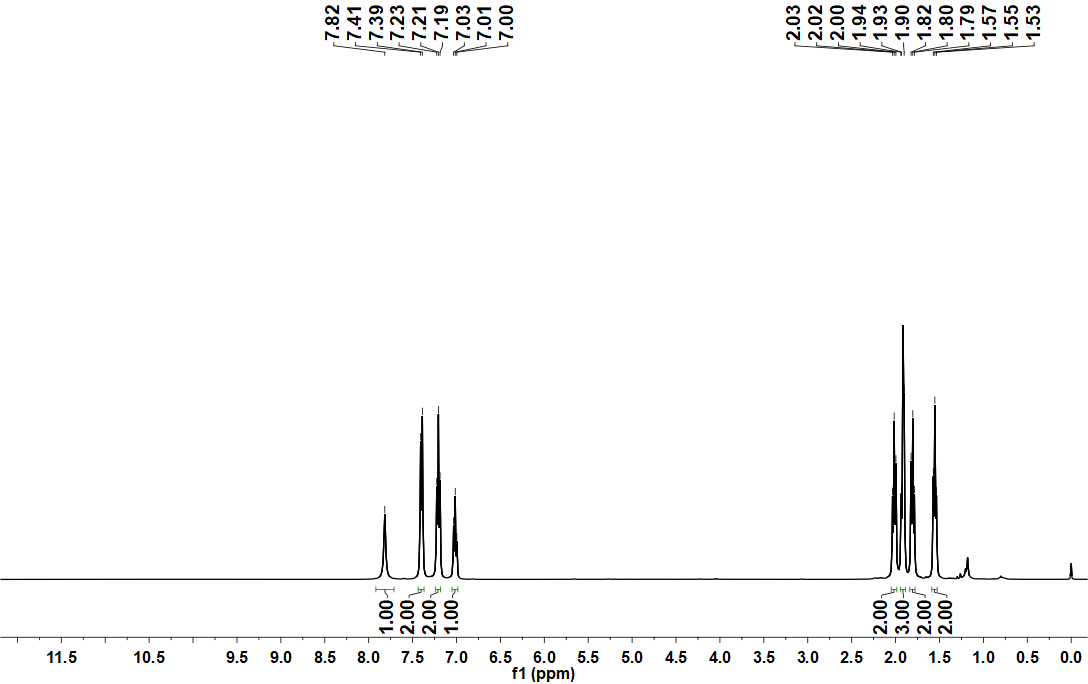


Supplementary Figure 43. **13C** NMR spectrum of compound NP in Chloroform-*d* (101 MHz).


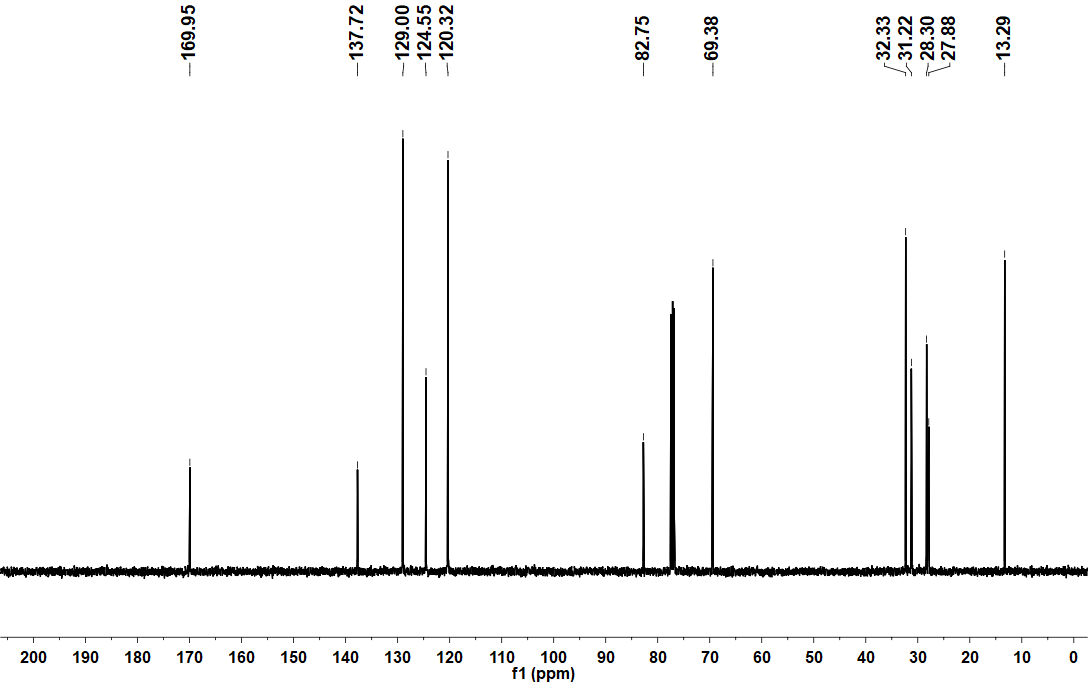


Supplementary Figure 44. 1H NMR spectrum of compound NP-1 in Chloroform-*d* (400 MHz).

**
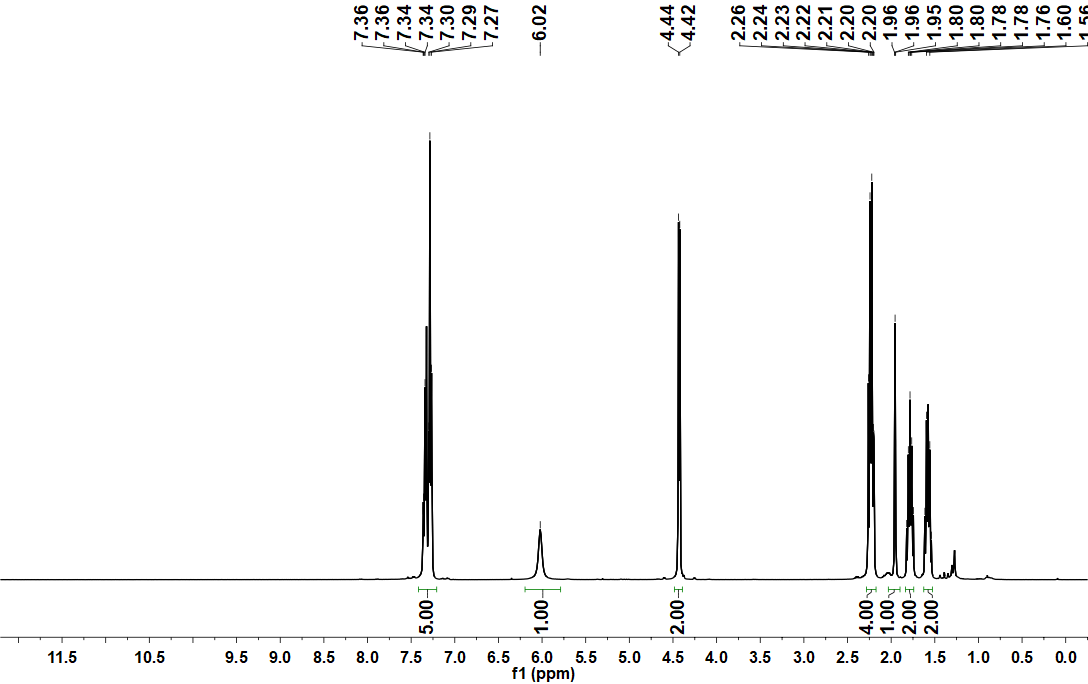
**

Supplementary Figure 45. **13C** NMR spectrum of compound NP-1 in Chloroform-*d* (101 MHz).

**
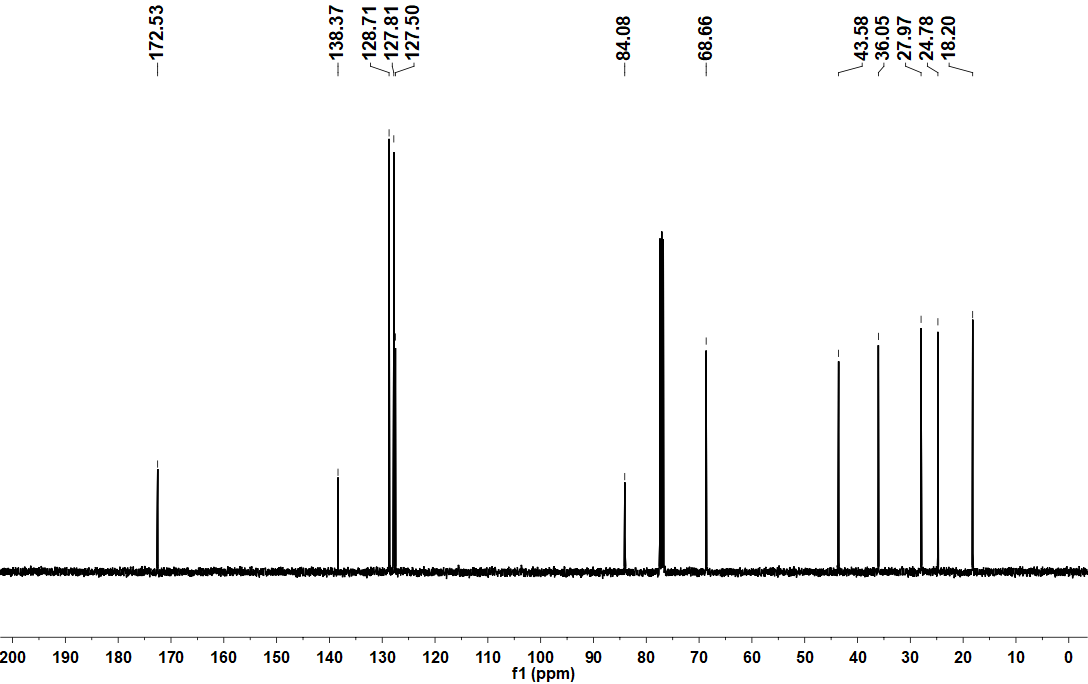
**

Supplementary Figure 46. 1H NMR spectrum of compound NP-2 in Chloroform-*d* (400 MHz).


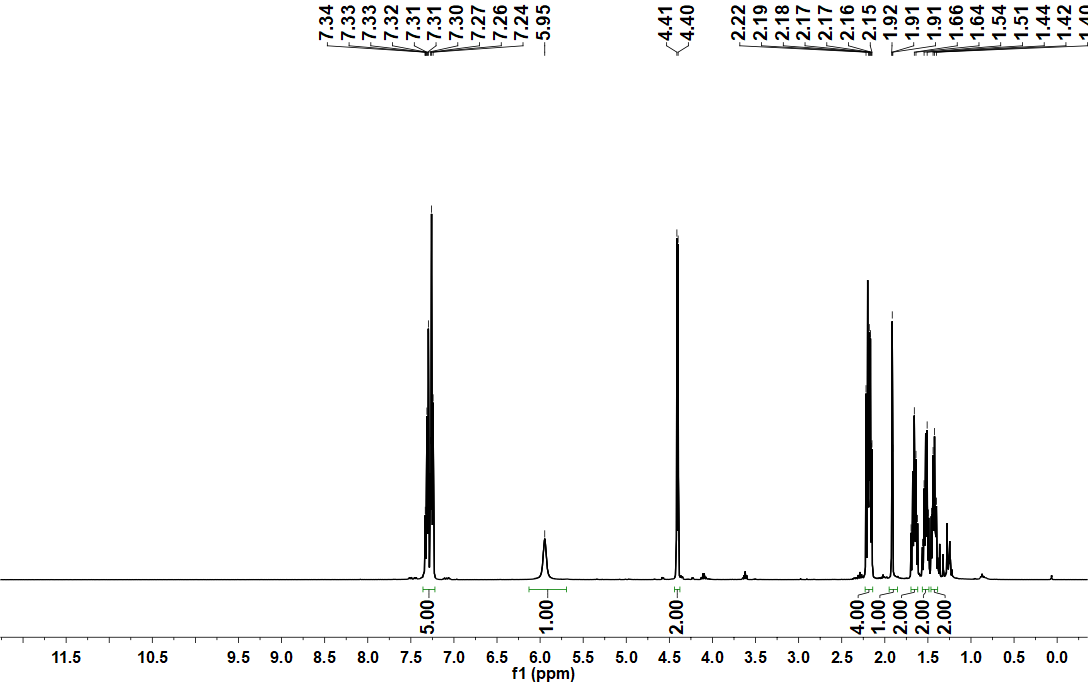


Supplementary Figure 47. **13C** NMR spectrum of compound NP-2 in Chloroform-*d* (101 MHz).


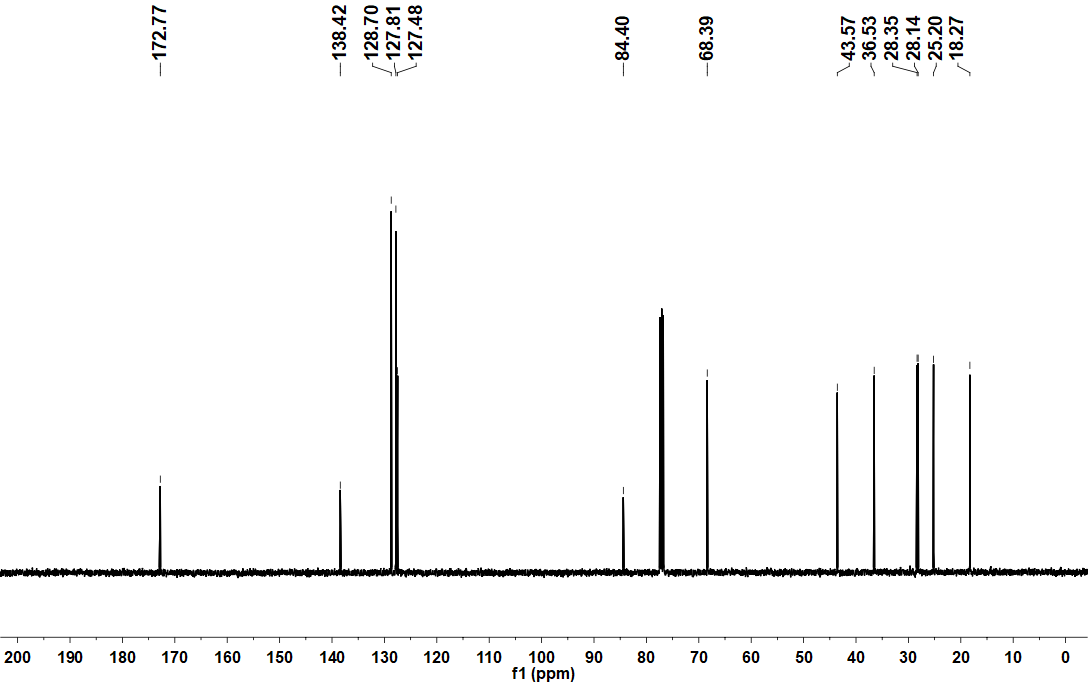


Supplementary Figure 48. HRMS spectrum of compound 10d-1.

Supplementary Figure 49. HRMS spectrum of compound 10d-2.

Supplementary Figure 50. HRMS spectrum of compound 10d-3.

Supplementary Figure 51. HRMS spectrum of compound 10d-4.

Supplementary Figure 52. HRMS spectrum of compound 10d-5.

Supplementary Figure 53. HRMS spectrum of compound NP-1.

Supplementary Figure 54. HRMS spectrum of compound NP-2.

HPLC data of probes used in biological assays.

Supplementary Table 5 overviewed the results of detection and the purity of all the probes used in biological assays. The purity of each compound was calculated from a surface integral of detected peaks. These purities were satisfied more than 95%.

Supplementary **Table 5. Results of HPLC detection and purity**.

| **Compound** | **Isocratic solvent** | **Retention time (min)** | **Purity (%)** |
| --- | --- | --- | --- |
| **10d-1** | 90% MeOH | 2.957 | 95.20 |
| **10d-2** | 90% MeOH | 3.333 | 95.84 |
| **10d-3** | 90% MeOH | 2.990 | 97.13 |
| **10d-4** | 90% MeOH | 3.013 | 95.82 |
| **10d-5** | 90% MeOH | 3.280 | 96.25 |
| **NP** | 90% MeOH | 3.387 | 99.68 |
| **NP-1** | 90% MeOH | 3.280 | 96.69 |
| **NP-2** | 90% MeOH | 3.383 | 95.21 |

Supplementary Figure 55. HPLC trace of compound 10d-1 (Retention time: 2.957 min, Purity: 95.20%).


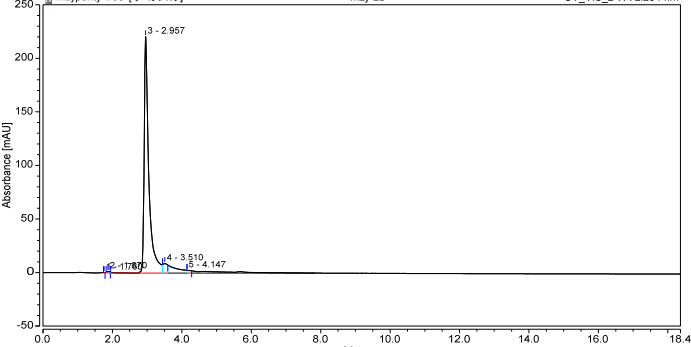


Supplementary Figure 56. HPLC trace of compound 10d-2 (Retention time: 3.333 min, Purity: 95.84%).


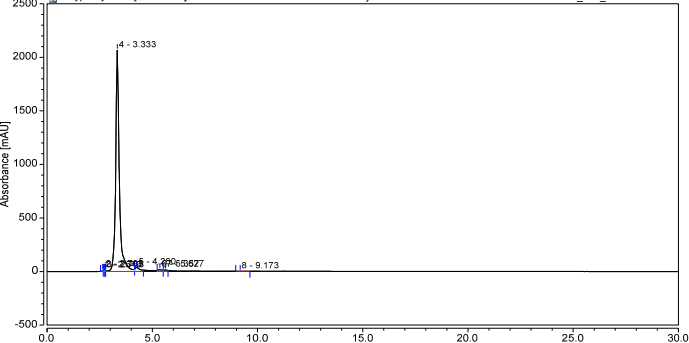


Supplementary Figure 57. HPLC trace of compound 10d-3 (Retention time: 2.990 min, Purity: 97.13%).


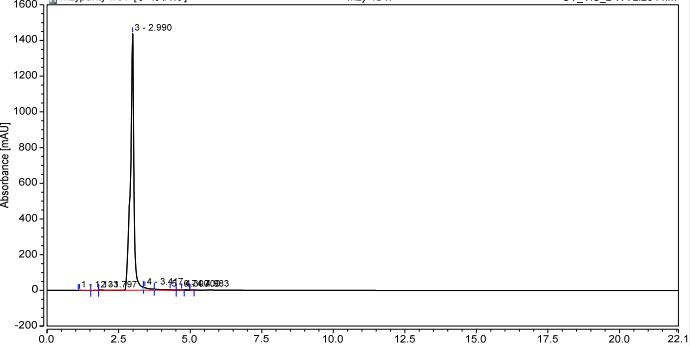


Supplementary Figure 58. HPLC trace of compound 10d-4 (Retention time: 3.013 min, Purity: 95.82%).


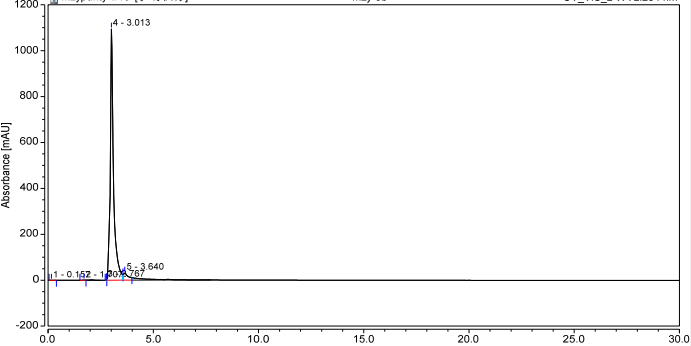


Supplementary Figure 59. HPLC trace of compound 10d-5 (Retention time: 3.280 min, Purity: 96.25%).


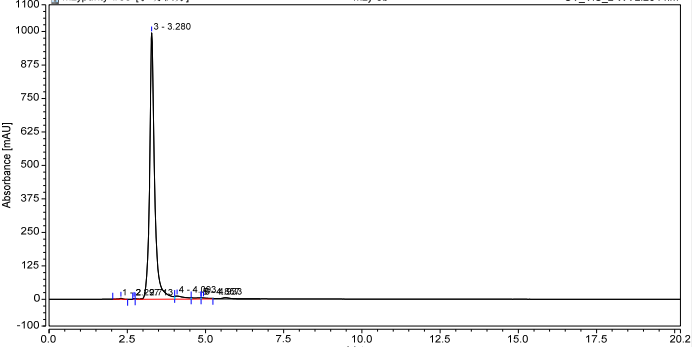


Supplementary Figure 60. HPLC trace of compound NP (Retention time: 3.387 min, Purity: 99.68%).


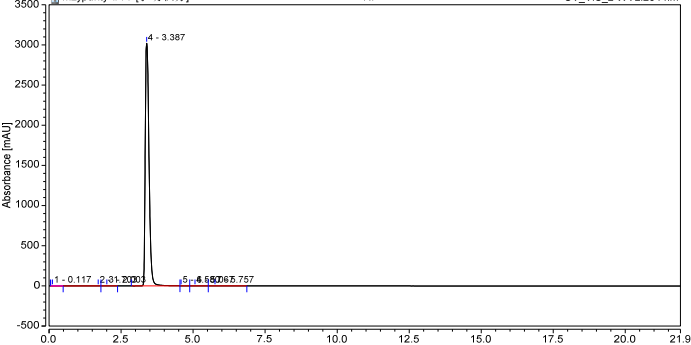


Supplementary Figure 61. HPLC trace of compound NP-1 (Retention time: 3.280 min, Purity: 96.69%).


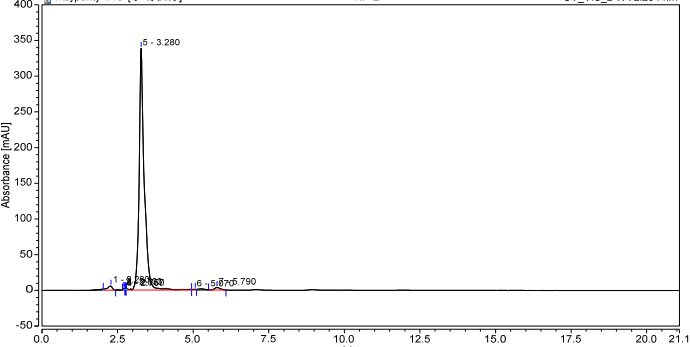


Supplementary Figure 62. HPLC trace of compound NP-2 (Retention time: 3.383 min, Purity: 95.21%).


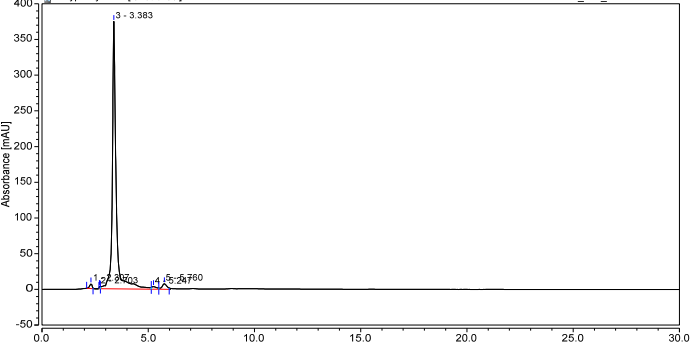

Supplement: Supplementary file 1 [file fa2276eaeaf579feb2896345.docx]
